# Supplementary material for: Evaluation of metformin in combination with rifampicin containing antituberculosis therapy in patients with new, smear-positive pulmonary tuberculosis (METRIF): study protocol for a randomised clinical trial
Source: PubMed Central journal article supplement — BMJ Open. 2019 Mar 1;9(3):e024363. doi: 10.1136/bmjopen-2018-024363 (PMC6429929; doi:10.1136/bmjopen-2018-024363), 2019-03-01
Supplement: bmjopen-2018-024363.draft_revisions.pdf [file bmjopen-2018-024363.draft_revisions.pdf]

# BMJ Open

BMJ Open is committed to open peer review. As part of this commitment we make the peer review history of every article we publish publicly available.

When an article is published we post the peer reviewers' comments and the authors' responses online. We also post the versions of the paper that were used during peer review. These are the versions that the peer review comments apply to.

The versions of the paper that follow are the versions that were submitted during the peer review process. They are not the versions of record or the final published versions. They should not be cited or distributed as the published version of this manuscript.

BMJ Open is an open access journal and the full, final, typeset and author-corrected version of record of the manuscript is available on our site with no access controls, subscription charges or pay-per-view fees (<http://bmjopen.bmj.com>).

If you have any questions on BMJ Open's open peer review process please email [editorial.bmjopen@bmj.com](mailto:editorial.bmjopen@bmj.com)

# BMJ Open

## Evaluation of Metformin in combination with Rifampicin containing Anti-tuberculosis therapy in patients with new, smear-positive pulmonary tuberculosis (METRIF): Study protocol for a randomized clinical trial

|                               |                                                                                                                                                                                                                                                                                                                                                                                                                                                                                                                                                                                                                                                                                                                |
|-------------------------------|----------------------------------------------------------------------------------------------------------------------------------------------------------------------------------------------------------------------------------------------------------------------------------------------------------------------------------------------------------------------------------------------------------------------------------------------------------------------------------------------------------------------------------------------------------------------------------------------------------------------------------------------------------------------------------------------------------------|
| Journal:                      | <i>BMJ Open</i>                                                                                                                                                                                                                                                                                                                                                                                                                                                                                                                                                                                                                                                                                                |
| Manuscript ID                 | bmjopen-2018-024363                                                                                                                                                                                                                                                                                                                                                                                                                                                                                                                                                                                                                                                                                            |
| Article Type:                 | Protocol                                                                                                                                                                                                                                                                                                                                                                                                                                                                                                                                                                                                                                                                                                       |
| Date Submitted by the Author: | 01-Jun-2018                                                                                                                                                                                                                                                                                                                                                                                                                                                                                                                                                                                                                                                                                                    |
| Complete List of Authors:     | Padmapriyadarsini, Chandrasekaran; National Institute for Research in Tuberculosis, P.K., Bhavani; National Institute for Research in Tuberculosis Natrajan, Mohan; National Institute for Research in Tuberculosis C, Ponnuraja; National Institute for Research in Tuberculosis Kumar, Hemanth; National Institute for Research in Tuberculosis Gomathy, N.S.; National Institute for Research in Tuberculosis Guleria, Randeep; All India Institute of Medical Sciences M.S., Jawahar; Open Source Pharma Foundation SIngh, Manjula; Indian Council of Medical Research Tanjore, Balganes; Open Source Pharma Foundation Swaminathan, Soumya; World Health Organisation; Indian Council of Medical Research |
| Keywords:                     | Protocols & guidelines < HEALTH SERVICES ADMINISTRATION & MANAGEMENT, Tuberculosis < INFECTIOUS DISEASES, Respiratory infections < THORACIC MEDICINE, Clinical trials < THERAPEUTICS, PUBLIC HEALTH                                                                                                                                                                                                                                                                                                                                                                                                                                                                                                            |
|                               |                                                                                                                                                                                                                                                                                                                                                                                                                                                                                                                                                                                                                                                                                                                |

SCHOLARONE™  
Manuscripts

1  
2  
3 **Evaluation of Metformin in combination with Rifampicin containing Anti-tuberculosis**  
4  
5 **therapy in patients with new, smear-positive pulmonary tuberculosis (METRIF):**  
6  
7 **Study protocol for a randomized clinical trial**  
8  
9

10  
11  
12 C Padmapriyadarsini<sup>1</sup>, PK Bhavani<sup>1</sup>, Mohan Natrajan<sup>1</sup>, C Ponnuraja<sup>1</sup>, Hemanth Kumar<sup>1</sup>,  
13 NS Gomathy<sup>1</sup>, Randeep Guleria<sup>2</sup>, M.S.Jawahar<sup>3</sup>, Manjula Singh<sup>4</sup>,  
14 T. Balganes<sup>3</sup>, Soumya Swaminathan<sup>4,5</sup>  
15  
16

17  
18 <sup>1</sup>ICMR National Institute for Research in Tuberculosis, Chennai

19 <sup>2</sup>AllIndia Institute for Medical Sciences, New Delhi

20 <sup>3</sup>Open Source Pharma Foundation, Bangalore

21 <sup>4</sup>Indian Council of Medical Research-India TB Research Consortium, New Delhi

22 <sup>5</sup>World Health Organization, Geneva  
23  
24  
25  
26  
27  
28  
29  
30  
31  
32  
33  
34

35 **E-mail address of Authors:**

36 **CPP:** [pcorchids@gmail.com](mailto:pcorchids@gmail.com) / **PKB:** [bhavanipk@yahoo.com](mailto:bhavanipk@yahoo.com) / **MN:** [mohan.n@nirt.res.in](mailto:mohan.n@nirt.res.in) / **CP:**  
37 [cponnuraja@nirt.res.in](mailto:cponnuraja@nirt.res.in) / **HK:** [akhemanth20@gmail.com](mailto:akhemanth20@gmail.com) / **NSG:** [gomathisharma@nirt.res.in](mailto:gomathisharma@nirt.res.in) / **RG:**  
38 [randeepguleria2002@gmail.com](mailto:randeepguleria2002@gmail.com) / **MSJ:** [shaheedjawahar@gmail.com](mailto:shaheedjawahar@gmail.com) / **MS:** [drmanjulasb@gmail.com](mailto:drmanjulasb@gmail.com) /  
39 **TB:** [tanjores.balganes@gmail.com](mailto:tanjores.balganes@gmail.com) / **SS:** [doctorsoumya@yahoo.com](mailto:doctorsoumya@yahoo.com)  
40  
41  
42  
43  
44  
45

46 **Address for Correspondence:**

47 Dr.Padmapriyadarsini  
48 National Institute for Research in Tuberculosis  
49 No.1, Mayor Sathyamoorthy Road  
50 Chetput, Chennai 600031  
51 Phone: +91 9498022949  
52 Fax No: 04428362525  
53 e-mail: [pcorchids@gmail.com](mailto:pcorchids@gmail.com)  
54  
55  
56  
57

## Abstract

**Introduction:** Shorter duration of treatment for the management of drug-susceptible pulmonary tuberculosis would be a major improvement in the care of patients suffering from tuberculosis (TB). Besides newer drugs and regimens, other modalities like host-directed therapy are also being suggested to reach this goal. This study's objective is to assess the efficacy and safety of a metformin containing anti-tuberculosis treatment (ATT) regimen in comparison to the standard 6-month ATT regimen in the treatment of newly diagnosed sputum smear positive drug-sensitive pulmonary tuberculosis patients.

**Methods and Analysis:** We are conducting a multicentric, randomized open-label controlled clinical trial to achieve the study objective. The intervention group will receive isoniazid (H), rifampicin (R), ethambutol (E) and pyrazinamide (Z) along with 1000mg of daily metformin (Met) for the first 2 months while the control group will receive only HRZE. After 2-months, both the groups will receive HRE daily for 4 months. The primary endpoint is time to sputum culture conversion. Secondary endpoints will include time to detection of *Mycobacterium tuberculosis* in sputum, pharmacokinetics and pharmacogenomics of study drugs, drug-drug interactions, safety and tolerability of the various combinations and measurement of autophagy and immune responses in the study participants.

**Ethics and Dissemination:** Study has been approved by the Ethics committee of the participating institutes. Results from this trial will contribute to evidence towards constructing a shorter, effective and safe regimen for TB patients. The results will be shared widely with the National Programme managers, policy makers and stake holders through open access publications, dissemination meetings, conference abstracts and policy briefs. This is expected to

1  
2  
3 provide a new standard of care for drug-sensitive pulmonary TB patients who will not only  
4  
5 reduce the number of clinic visits and lost to follow-up of patients from treatment but also reduce  
6  
7 the burden on the health care system.  
8  
9

10 **Trial Registration:** The protocol has been registered on Clinical Trial Registry of India with  
11  
12 identifier CTRI/2018/01/011176 on January 8<sup>th</sup>, 2018. This is available on  
13  
14 [http://ctri.nic.in/Clinicaltrials/rmaindet.php?trialid=20868&EncHid=72267.74662&modid=1&co](http://ctri.nic.in/Clinicaltrials/rmaindet.php?trialid=20868&EncHid=72267.74662&modid=1&compid=19)  
15  
16 [mpid=19](http://ctri.nic.in/Clinicaltrials/rmaindet.php?trialid=20868&EncHid=72267.74662&modid=1&compid=19)  
17  
18  
19  
20  
21

### 22 **Strength and Limitations:**

- 23
- 24 • This controlled clinical trial will add strength to observations from other retrospective  
25 and case-control studies that showed metformin to be a protective agent against TB  
26 infection among diabetics  
27
- 28 • Results from this trial will contribute to evidence towards constructing a shorter,  
29 effective and safe regimen for TB patients  
30
- 31 • Due to the strict exclusion and inclusion criteria of the clinical trial, the results from the  
32 clinical trial may not be generalizable to all groups of TB patients.  
33
- 34 • Some degree of heterogeneity of data is expected as it is a multicentric study  
35
- 36 • Relapse rates may not be known in this trial as the study duration only for 6 months of  
37 treatment in lieu with the study objective  
38  
39  
40  
41  
42  
43  
44  
45  
46  
47

48 **Keywords:** Metformin, Pulmonary Tuberculosis, Clinical trial, Short-course therapy, TB  
49  
50 treatment  
51  
52  
53  
54  
55  
56  
57

## Introduction:

Globally in 2016, there were an estimated 10.4 million new cases of tuberculosis (TB) with five countries, India, Indonesia, China, Philippines and Pakistan accounting for 56% of the total cases [1]. There were an estimated 1.3 million TB deaths in 2016 among HIV-negative people, and an additional 374000 deaths among people living with HIV [1]. Though effective regimens are available for the treatment of drug-sensitive TB with more than 95% cure, the long duration of such regimens have posed problems for TB treatment and control. This, along with drug toxicity results in poor adherence to treatment resulting in emergence of drug resistance.

The global need for new effective therapies has led to a resurgence in efforts to identify additional anti-*M.tb* agents, several of which are now being evaluated in clinical trials. However, conventional pathogen-targeted strategies suffer from the serious disadvantage of fostering microbial resistance. To circumvent this problem, a new paradigm in drug discovery has emerged that involves therapeutic modulation of the host immune responses which leads to better and faster pathogen elimination [2, 3].

An effective host immune system is a crucial factor for both the control and containment of *M.tb* growth. The success of *M.tb* in infecting the host cells and maintaining long-term persistent infection is associated with the ability of bacilli to evade host innate as well as adaptive immune responses [4, 5]. "Host-targeted" adjunct therapeutic strategies not only augment protective host immune responses but also reduce the chance of development of microbial resistance.

One among the host cell innate antimicrobial arsenal includes the capacity to destroy intracellular pathogens using the phagosomal machinery or autophagy pathway. Autophagy is required for the effective control of intracellular pathogens [6] and is regulated by adenosine

1  
2  
3 monophosphate-activated protein kinase (AMPK) [7]. Accordingly, perturbations in the  
4 autophagy network and AMPK signaling have been associated with *M.tb* virulence [8]. The  
5 antidiabetic drug Metformin (MET; 1,1-dimethylbiguanide), is an AMPK modulator that  
6 inhibits the intracellular growth of *M.tb*, restricts disease immunopathology, and enhances the  
7 efficacy of conventional anti-TB drug [9]. In view of these promising findings we plan to test  
8 whether the existing approved anti-diabetic drug, Metformin added to existing anti-TB regimen,  
9 with its defined effects on host cell functions could be repurposed for effective and faster  
10 treatment of TB as compared to the current standard of care anti-TB regimens.  
11  
12  
13  
14  
15  
16  
17  
18  
19  
20

21 The Primary objective of this study- the METRIF study- is to study the antibacterial  
22 activity, in terms of time to sputum culture conversion of a metformin containing anti-  
23 tuberculosis treatment (ATT) regimen instituted during the initial 8-weeks of treatment in  
24 patients with newly diagnosed sputum smear positive pulmonary TB. Time to positivity or  
25 detection (TTD) of *M.tb* in culture in metformin containing regimen will be compared with the  
26 control group given only ATT as a secondary objective. Secondary objectives of the study  
27 include three other aspects (i) the autophagy enhancing effect and host immune responses when  
28 metformin is given along with ATT, (ii) post-dosing serum concentration of anti-TB drugs and  
29 metformin, their interactions and the effect of genomics - on these parameters (pharmacokinetics  
30 and pharmacogenomics) and (iii) the safety and tolerability of metformin by measuring the  
31 incidence of Treatment Emergent Adverse Events.  
32  
33  
34  
35  
36  
37  
38  
39  
40  
41  
42  
43  
44  
45  
46  
47  
48  
49

## 50 **Methods and Analysis**

51  
52  
53 Study Design and oversight: METRIF is a multi-site, randomized, open-labelled, parallel  
54 arm, controlled clinical trial comparing the time to sputum culture conversion among patients  
55  
56  
57

with pulmonary TB receiving ATT with metformin (experimental arm) compared to those receiving ATT alone (control arm). The study is randomizing 316 participants to one of the two treatment arms in a 1:1 allocation. The study is sponsored by the India TB Research Consortium of the Indian Council of Medical Research and Open Source Pharma Foundation and implemented by the National Institute of Research in Tuberculosis (NIRT), together with other specialized institutes. The study has been approved by the Institutional ethics committee of NIRT (NIRT-IEC ID: 2017030, dated 14<sup>th</sup> December 2017) and NARI (NARI EC / 2018-10 dated 16<sup>th</sup> February 2018) and will begin enrollment tentatively by 15<sup>th</sup> June 2018. .

*Study setting:* METRIF study will be implemented at three sites in India - NIRT, Chennai and its satellite centers in Madurai and Vellore; All India Institute of Medical Sciences (AIIMS), New Delhi, and, National AIDS Research Institute (NARI), Pune. These sites will recruit study participants from academic institutions / hospitals as well as community clinics.

*Study patients and eligibility:* Adult patients, previously untreated and newly diagnosed as pulmonary TB with at least 2 sputum smear sample, collected on two different occasions, positive for acid-fast bacilli and susceptible to rifampicin detected by cartridge-based nucleic acid amplification test will be eligible for the study. Detailed inclusion and exclusion criteria are provided in Table 1. Patients who meet these criteria at presentation and attending the identified study sites will be approached to participate in the study.

**Table 1: Eligibility Criteria**

| Inclusion Criteria                  | Exclusion Criteria                          |
|-------------------------------------|---------------------------------------------|
| age 18 years and above              | Is pregnant or breast feeding               |
| Is willing to undergo HIV testing   | Has extra-pulmonary TB or drug-resistant TB |
| Has body weight between 30kg - 65kg | Has body weight < 30 kgs or > 65 kgs        |



|                                                                                                       |                                                                                                                                                                                  |
|-------------------------------------------------------------------------------------------------------|----------------------------------------------------------------------------------------------------------------------------------------------------------------------------------|
| Has never been treated with multidrug anti-TB therapy for more than a week.                           | Has prior history of exposure to anti-TB treatment for more than a week                                                                                                          |
| Is willing to use effective contraceptive method during the study period                              | Has history of liver disease or current amino alanine transferase greater than 3 times the upper limit of normal or total bilirubin concentration greater than 2.5 times the ULN |
| Is willing to attend treatment center for supervised treatment and remain within the study area limit | Is serology positive for hepatitis B virus surface antigen or hepatitis C virus antibody                                                                                         |
| Is willing to sign the informed consent form and adhere to trial procedures and follow-up             | Has concomitant psychiatric illness or seizures                                                                                                                                  |
| Consents for Home visits by the study team                                                            | Has concomitant diabetes mellitus or random blood sugar > 200mg or fasting blood sugar >140 mg/dl                                                                                |
|                                                                                                       | Has serum creatinine >1.2 mg/dL or blood urea >43 mg/dL                                                                                                                          |

*Study regimen and Drug dosing:* Eligible patients who have provided written informed consent will be randomly assigned to one of the study regimen in a ratio of 1:1. Study informed consent will be obtained by the Principal investigator at the site or his/her nominee who is capable of answering all the trial-related questions from the participants. Study participation will last 6 months: during the first 2 months participants will receive the randomly assigned regimen of either daily ATT with metformin or only ATT.

1  
2  
3 1) Test regimen – Metformin + Isoniazid + Rifampicin+ Pyrazinamide + Ethambutol daily

4  
5 [2MetHREZ<sub>7</sub>] or

6  
7  
8 2) Control regimen – Isoniazid+ Rifampicin + Pyrazinamide + Ethambutol daily [2HRZE<sub>7</sub>]

9  
10 After 2-months, all study participants in both the arms will receive the standard 4-month  
11 continuation phase of HRE daily. Treatment will be supervised and directly observed at health  
12 facility or by DOT provider. Metformin will be dosed as 500 mg once daily for the 1<sup>st</sup> week and  
13 then 1000mg once daily for the remaining period of 7 weeks. Dosing of the other anti-TB drugs  
14 will be based on weight bands as shown in table 2.

15  
16 All drugs (H, R, E, Z and Met) used in the trial will be centrally procured, checked for their  
17 stated content by validated methods using High Performance Liquid Chromatography at NIRT  
18 Clinical pharmacology department, prior to dispatching it to the enrolling sites for administration  
19 to patients.  
20

21  
22  
23  
24  
25  
26  
27  
28  
29  
30  
31 **Table 2: Weight based dosing of anti-tuberculosis drugs**

32

| Weight Band | Isoniazid | Rifampicin | Pyrazinamide | Ethambutol |
|-------------|-----------|------------|--------------|------------|
| 25-39 kg    | 150 mg    | 300 mg     | 800 mg       | 550 mg     |
| 40-54 kg    | 225 mg    | 450 mg     | 1200 mg      | 825 mg     |
| 55-69 kg    | 300 mg    | 600 mg     | 1600 mg      | 1100 mg    |
| ≥70 kg      | 375 mg    | 750 mg     | 2000 mg      | 1375mg     |

33  
34  
35  
36  
37  
38  
39  
40  
41  
42  
43

44 Treatment allocation : Permuted block Randomization will be done centrally using a  
45 computer-generated list of random numbers, stratified by presence or absence of cavities in chest  
46 x-ray and highest sputum smear grading at baseline (<2 or ≥2). Separate randomization lists for  
47 each combination of strata for each site will be prepared in advance by an independent  
48 statistician, using varying block sizes. Allocation codes will be generated at the central site and  
49  
50  
51  
52  
53  
54  
55  
56  
57  
58  
59  
60

1  
2  
3 at the time of patient's admission to the study, the central statistician through e-mail will inform  
4  
5 the site the regimen based on appropriate stratification factors.  
6

7  
8 Recruitment process: All newly diagnosed sputum smear positive pulmonary TB patients  
9  
10 attending the chest clinics at the study sites will be screened for study eligibility. Table 3 details  
11  
12 the various study procedures. At their first visit, the study will be explained, including the  
13  
14 potential risks and benefits associated with participation. Informed consent will be obtained  
15  
16 before any protocol-specific screening procedures are carried out. Consenting participants will  
17  
18 undergo sputum testing for smear, culture (both solid and liquid media) and rifampicin resistance  
19  
20 testing by GeneXpert. Blood samples will be obtained for HIV antibodies (unless the patient is  
21  
22 already known to be HIV positive), liver and renal function tests and blood sugar levels. Patients  
23  
24 will be re-assessed for eligibility when returning with their investigation results. Those patients  
25  
26 who do not have rifampicin resistance and are willing to take part in the study, sign an enrolment  
27  
28 consent form (or a thumb print in the presence of a witness, if illiterate), and are admitted to the  
29  
30 study and randomized to one of the study regimens. During the first two months of treatment, all  
31  
32 patients will undergo weekly sputum testing for *M.tb* by smear, liquid and solid cultures and  
33  
34 sparse pharmacokinetics of ATT drugs and metformin. Intense pharmacokinetic study will be  
35  
36 done in a subset of patients. Randomized patients have an additional blood investigation for  
37  
38 immunological and autophagy biomarkers (T-cell, monocyte & dendritic cell functions both ex-  
39  
40 vivo and following stimulation with TB antigens including PPD and ESAT-6/CFP-10, estimation  
41  
42 of CRP, TNF- $\alpha$ , and other cytokines) pre and post metformin containing ATT.  
43  
44  
45  
46  
47  
48

49 Patients ineligible or unwilling to participate in the study will be referred to the national  
50  
51 programme for treatment as per the existing guidelines.  
52  
53  
54  
55  
56  
57

**Table 3 : Study schedule of enrolment, interventions, and assessments.**

|     |                                                                | STUDY PERIOD   |            |                                          |     |     |     |     |     |     |     |                                                  |     |     |     |           |   |
|-----|----------------------------------------------------------------|----------------|------------|------------------------------------------|-----|-----|-----|-----|-----|-----|-----|--------------------------------------------------|-----|-----|-----|-----------|---|
|     |                                                                | ENROLMENT      | ALLOCATION | INTENSIVE PHASE OF ATT<br>(TRIAL PERIOD) |     |     |     |     |     |     |     | CONTINUATION PHASE OF ATT<br>(POST-TRIAL PERIOD) |     |     |     | CLOSE OUT |   |
| I   | ENROLMENT                                                      | Baseline (-D7) | W 0        | W 1                                      | W 2 | W 3 | W 4 | W 5 | W 6 | W 7 | W 8 | M 3                                              | M 4 | M 5 | M 6 | M 7       |   |
| 1   | Informed consent                                               | x              |            |                                          |     |     |     |     |     |     |     |                                                  |     |     |     |           |   |
| 2   | Eligibility Screen (including lab tests)                       | x              |            |                                          |     |     |     |     |     |     |     |                                                  |     |     |     |           |   |
| 3   | Sputum Gene Xpert                                              | x              |            |                                          |     |     |     |     |     |     |     |                                                  |     |     |     |           |   |
| 4   | HIV, Hepatitis B & C                                           | x              |            |                                          |     |     |     |     |     |     |     |                                                  |     |     |     |           |   |
| II. | ALLOCATION                                                     |                | x          |                                          |     |     |     |     |     |     |     |                                                  |     |     |     |           |   |
| III | TRIAL REGIMENS                                                 |                |            |                                          |     |     |     |     |     |     |     |                                                  |     |     |     |           |   |
|     | Test Regimen (Metformin containing ATT)                        |                | x          | x                                        | x   | x   | x   | x   | x   | x   | x   |                                                  |     |     |     |           |   |
|     | Control regimen (Only ATT)                                     |                |            | x                                        | x   | x   | x   | x   | x   | x   | x   |                                                  |     |     |     |           |   |
|     | Continuation Phase of ATT<br>(For both groups)                 |                |            |                                          |     |     |     |     |     |     |     | x                                                | x   | x   | x   |           |   |
| IV  | ASSESSMENTS                                                    |                |            |                                          |     |     |     |     |     |     |     |                                                  |     |     |     |           |   |
| 1   | Clinical Evaluation                                            | x              | x          | x                                        | x   | x   | x   | x   | x   | x   | x   | x                                                | x   | x   | x   | x         |   |
| 2   | Sociological Assessment                                        | x              | x          |                                          |     |     | x   |     |     |     | x   | x                                                | x   | x   | x   | x         |   |
| 3   | Sputum smear & culture (MGIT, LJ)                              | x              |            | x                                        | x   | x   | x   | x   | x   | x   | x   | x                                                | x   | x   | x   |           |   |
| 4   | Urine Pregnancy tests / Sugar / Alb                            | x              |            |                                          |     |     | x   |     |     |     | x   | x                                                | x   | x   |     |           |   |
| 5   | HbA1c                                                          | x              |            |                                          |     |     |     |     |     |     | x   |                                                  |     |     | x   |           |   |
| 6   | CBC, LFT, RFT, Lactic acid ,<br>peripheral smear & chest x-ray | x              |            |                                          |     |     | x   |     |     |     | x   |                                                  |     |     | x   |           |   |
| 7   | Random blood sugar                                             | x              |            |                                          | x   |     | x   |     | x   |     | x   |                                                  |     |     | x   |           |   |
| 8   | Pharmacokinetics & genomics                                    |                |            |                                          |     |     | x   |     |     |     | x   |                                                  |     |     |     |           |   |
| 9   | Immunological studies                                          |                | x          |                                          |     |     |     |     |     |     | x   |                                                  |     |     | x   |           |   |
| 10  | Storage Plasma/cell sample                                     |                | x          |                                          |     |     | x   |     |     |     | x   |                                                  |     |     | x   |           |   |
| V   | OUTCOMES                                                       |                |            |                                          |     |     |     |     |     |     |     |                                                  |     |     |     |           | x |

1  
2  
3                   Treatment delivery, compliance and retention: ATT will be administered under direct  
4 observation for 6-days of the week and supplied for the seventh day. The importance of  
5 adherence to the treatment schedule will be reinforced at each visit. If the patient misses drug  
6 doses in the intensive phase (IP) or continuation phase (CP), it will be compensated at the end of  
7 the respective phases over next 15 days, so that the patient receives 60 doses of the assigned  
8 regimen in the IP and 120 doses in the CP. Retention of the participants in the study will be  
9 facilitated through through treatment supporters and enablers. All treatment is ambulatory and  
10 delivered by dedicated directly observed therapy (DOT) supporters. Treatment adherence will be  
11 assessed through reviews of treatment card throughout the IP and CP and by accounting for the  
12 empty pill covers returned if the drugs are supplied for any reason. Treatment adherence will be  
13 enhanced by – reimbursing the transport costs and loss of wages incurred by the participant  
14 during the study visits. They will also receive food supplement every month during the entire  
15 study period and meals during prolonged study visits.  
16  
17  
18  
19  
20  
21  
22  
23  
24  
25  
26  
27  
28  
29  
30  
31

32  
33                   Concomitant medication while in the trial: Concomitant antibiotic treatments of any kind  
34 are discouraged during the period of study drug administration. During the course of the trial,  
35 short course (< 2 weeks) antimicrobial therapy may be permitted for concurrent illnesses.  
36 Concomitant non-antibiotic treatments should be kept to a minimum during the study. Only those  
37 considered necessary for the subject's welfare and are unlikely to interfere with the study  
38 medication, may be given at the discretion of the investigator. The following agents used to treat  
39 *M. tb* infections should not be used during the trial: Streptomycin, Thiacetazone, PAS, Dapsone,  
40 Amoxicillin clavulanic acid/ clavulanate, Clofazimine, Capreomycin, any oxazolidinone  
41 antibiotic (e.g., linezolid), Ofloxacin, Levofloxacin or Moxifloxacin.  
42  
43  
44  
45  
46  
47  
48  
49  
50  
51  
52  
53  
54  
55  
56  
57  
58  
59  
60

1  
2  
3 Criteria for Discontinuation/ Withdrawal of study participants: A patient may be withdrawn  
4  
5 from the study for any of the following reasons – Pregnancy, if the investigators feel that staying  
6  
7 in the study is harmful to the patient, if the patient does not follow study procedures or is not  
8  
9 available for appointments, if the study sponsor or NIRT or representative of the Drugs  
10  
11 Controller General of India decide to stop or cancel the study, if the Data and Safety Monitoring  
12  
13 Board recommends that the study should be stopped or if the patient wishes to withdraw for any  
14  
15 reasons. In such cases, appropriate treatment, as per the standard of care treatment available then  
16  
17 will be ensured for patients taking into consideration the drug susceptibility pattern of the  
18  
19 individual.  
20  
21  
22

23  
24 Study Outcomes: The primary outcome is the time to sputum culture conversion, which is  
25  
26 assessed by the time interval between the date of treatment initiation and the date of acquisition  
27  
28 of the first of at least two consecutive negative cultures taken at least 8 days apart. Also time to  
29  
30 positivity as well as change in *M.tb* log<sub>10</sub> colony forming units (CFU) in culture will be assessed  
31  
32 in the two treatment arms of the study. Proportion of participants with sputum culture negativity  
33  
34 will also be determined on a weekly basis between the two arms.  
35  
36

37  
38 The pharmacokinetic (PK), area under the concentration curve (AUC), will be assessed through  
39  
40 blood sampling on a single day during the first month of ATT, after a minimum of seven doses  
41  
42 of RMP and MET (1000mg). Minimum inhibitory concentration (MIC) of each participant's pre-  
43  
44 treatment infecting isolate will be estimated from early morning and overnight sputum samples  
45  
46 collected at the pre-treatment visit. Genomics results of Metformin and Rifampicin will be  
47  
48 compared with the plasma concentration of these drugs and will be associated with  
49  
50 bacteriological and clinical endpoints along with drug-drug interaction of metformin and  
51  
52 rifampicin.  
53  
54  
55  
56  
57

1  
2  
3 For the occurrence of Treatment Emergent Adverse Events (TEAEs), clinical and  
4 laboratory abnormalities will be graded by clinical investigators according to the modified Adult  
5 Toxicity Table for the Division of Microbiology and Infectious Diseases, National Institutes of  
6 Health [11]. The safety and tolerability analysis will include all patients who were randomized to  
7 and received at least one dose of the study regimen.  
8  
9  
10  
11  
12  
13  
14

15 *Participant Timeline:* The trial will consists of three stages - Screening and enrolment (a  
16 maximum of 1 week); Intensive phase of treatment with or without test drug (2 months) followed  
17 by continuation phase of standard drugs (4 months). Figure 1 shows the schedule of enrolment,  
18 interventions and assessments of participants in the trial.  
19  
20  
21  
22  
23  
24

25 *Patient and public involvement:* Patients were not involved in the development of research  
26 question or the design of this study as the scientific question is still not proven and only in  
27 research arena. However, considering the relevance of the study outcome to public health,  
28 policy-makers, general public, advocates etc are members of our scientific advisory committee  
29 and Institutional Ethics committee. Also the study will be discussed in our Community Advisory  
30 Board of the institute which consists of patients, peers and responsible members of the society.  
31 Patients will be involved in the recruitment and conduct of the study. Results of the study will be  
32 widely disseminated through meetings, workshops, conference presentation and publication  
33  
34  
35  
36  
37  
38  
39  
40  
41  
42  
43  
44

45 *Sample Size Assumption:* Published literature has shown a median time to sputum culture  
46 conversion by liquid medium with daily ATT to be 32 days [10]. With addition of metformin, we  
47 assumed a 30% reduction in the time to culture conversion i.e., to approximately 22 days. We  
48 estimated that we will require 150 new sputum smear positive patients to show this difference at  
49 80% power, an alpha level of 0.05 and a hazards ratio of 1.5. With the assumption that 5% of  
50  
51  
52  
53  
54  
55  
56  
57  
58  
59  
60

1  
2  
3 patients will be lost to follow-up or not assessable in the primary analysis, a total target sample  
4 size of 158 patients in each treatment arm would be required, totaling to 316 patients for the  
5 study.  
6  
7  
8

9  
10 Randomization Procedures: Permuted block Randomization will be done centrally using a  
11 computer-generated list of random numbers, stratified by presence or absence of cavities on  
12 chest x-ray and highest sputum smear grading (<2 or >2). The randomization sequence will not  
13 be available to those who enroll participants. Allocation codes will be generated at the central  
14 site, NIRT and will take place at the time of patient's admission to the study. Upon receiving an  
15 electronic-mail request from the study sites, for allocation of a participant to the study, the NIRT  
16 statistician will do allocation procedure centrally based on appropriate stratification factors.  
17 He/She will then inform the site physician, through e-mail, the study regimen along with the  
18 unique study ID for patient enrolment to the study.  
19  
20  
21  
22  
23  
24  
25  
26  
27  
28  
29

30  
31 Data Collection, Management and Interim Analysis: Study randomization will be done  
32 centrally by the Central Data management (CDM) unit at NIRT, Chennai over e-mail. During  
33 the study conduct, data will be collected at sites at baseline and follow-up on pre-defined case  
34 record forms and will be electronically transmitted to the CDM unit. Data will be checked for  
35 correctness and completeness before transmitting. Periodic quality check of the data will also be  
36 done by the central team. Data collected will include a) improvement in disease status in terms of  
37 abatement of symptoms, signs and sputum cultures conversion and b) safety and tolerability of the  
38 regimen in terms of both clinical and laboratory adverse events.  
39  
40  
41  
42  
43  
44  
45  
46  
47  
48

49 During the trial all essential trial documents including the source documents, informed  
50 consent forms, etc. will be stored securely under lock and key at the recruiting sites under the  
51 supervision of the site investigator. All e-data will be password protected with limited access to  
52  
53  
54  
55  
56  
57



1  
2  
3 the investigator and their teams alone. The records will be retained for a minimum period of five  
4  
5 years after completion of the study.  
6

7  
8 Two interim analyses are planned during the study period, viz. after 33% and 66% of the  
9  
10 enrolled patients have completed 8-weeks of Metformin treatment and with sputum culture  
11  
12 results available for analysis. In addition, interim analysis may be done if the frequency of  
13  
14 reported serious adverse events is greater than anticipated. Final analysis will be done when all  
15  
16 enrolled patients have completed 6 months of ATT.  
17

18  
19 Study Outcome analysis: The primary efficacy analysis will compare the median time to  
20  
21 culture negativity. This analysis will be done when the last enrolled patient has completed 8  
22  
23 weeks of treatment and will be done using culture results from liquid culture (MGIT) and in  
24  
25 those who are not isoniazid or RMP mono-resistant at baseline. Both a Modified Intent to Treat  
26  
27 (MITT) and a Per Protocol (PP) analysis will be conducted. Secondary outcome parameters will  
28  
29 include proportion and time to sputum culture positivity using the MGIT system. The safety and  
30  
31 tolerability analysis will include all patients who were randomized to and received at least one  
32  
33 dose of the drug. Based on plasma drug concentrations obtained at different time points, certain  
34  
35 pharmacokinetic variables will be calculated. Drug peak concentrations (C<sub>max</sub>) and exposure  
36  
37 (AUC) will be related to time to sputum conversion and occurrence of adverse events  
38  
39  
40

41  
42 Data Safety Monitoring Board (DSMB): The DSMB, consisting of TB clinicians,  
43  
44 pharmacokinetic specialists, and an independent biostatistician, will review data of this trial on a  
45  
46 regular basis. The role of the DSMB will be to review the progress of the trial, and detect  
47  
48 evidence of early safety issues from the data collected, for the trial participants, while the trial is  
49  
50 ongoing. The following safety parameters will be analyzed for the regular DSMB meetings:  
51  
52 incidence and severity of all AEs with specific focus on grade 3 or 4 AEs, SAEs, and treatment  
53  
54  
55  
56  
57

1  
2  
3 discontinuations due to AE. Based on the results, DSMB shall make recommendations on  
4  
5 continuing or terminating / modifications to the trial.  
6

7  
8 Clinical Site Monitoring & Quality assurance: An independent study Monitor, appointed  
9  
10 by the sponsor, will be responsible for monitoring data quality in accordance with trial Standard  
11  
12 Operating Procedures. Based on the monitoring plan, field visit and audit will be performed at  
13  
14 different stages. All participant records, CRFs, and other source documents for the patients  
15  
16 recruited in this study will be made available for review by the monitors. A meeting of the  
17  
18 investigators of each local site will convene monthly via web-based remote conference system to  
19  
20 share the progress of study and discuss with the problems met during the trial conduct. During  
21  
22 the conduct of the study, any important protocol modifications will be informed to the IEC, trial  
23  
24 registry and if relevant to the trial participants.  
25  
26

27  
28 Confidentially of trial data: The processing of personal data in this trial will be limited to  
29  
30 those data that are reasonably necessary to investigate the anti-bacterial activity, safety, and  
31  
32 tolerability of the investigational product used in this trial. These data will be processed with  
33  
34 adequate precautions to ensure confidentiality. The data will be collected by trained  
35  
36 professionals with utmost sensitivity and confidentiality. The study participant will be informed  
37  
38 during the informed consent process that - the monitor(s), the IEC, and the regulatory  
39  
40 authority(ies) will be granted direct access to the participant's original medical records for  
41  
42 verification of clinical trial procedures and/or data, without violating the confidentiality of the  
43  
44 participant, to the extent permitted by the applicable laws. Otherwise, only the study investigator  
45  
46 and his/her team will have access to the trial data.  
47  
48  
49  
50  
51  
52  
53  
54  
55  
56  
57  
58  
59  
60

## **Ethics and Dissemination**

This trial will be conducted in accordance with the current ICH Good Clinical Practice and the ICMR Ethical guidelines for biomedical research in human participants. Compliance with this standard provides public assurance that the rights, safety and well-being of trial subjects are protected; consistent with the principles that have their origin in the Declaration of Helsinki, and that the clinical trial data are credible. The confidentiality of the study participants will be protected throughout the study period as per provision in the Indian-GCP & applicable regulations by laws of India. The processing of personal data in this trial will be limited to those data that are reasonably necessary to investigate the anti-bacterial activity, safety, and tolerability of the investigational product used in this trial.

The study principal investigator holds primary responsibility for the preparation of manuscripts and materials for result dissemination and publication. Once the trial is complete, the investigators anticipate publishing results of this study in several peer-reviewed scientific journals, presenting the abstracts in meetings, to stakeholders and policy makers and share the results widely with the Programme managers. Trial participant details will not be shared during any of these processes.

## **Discussions:**

Currently, for the management of new sputum smear positive drug-sensitive pulmonary TB patients, 6-month regimens are used in more than 90 countries that are evaluated to be effective [12]. Newer anti-TB drugs are also in pipeline. However, all types of treatment currently available are pathogen-targeted. They are also associated with drug-toxicity which leads to poor adherence to treatment resulting in treatment failure and development of resistance.

1  
2  
3 As the pathogen-targeted strategies may lead to development of acquired microbial resistance,  
4 new “host-targeted” adjunct therapeutic strategies not only are less likely to engender microbial  
5 resistance but also augment protective host immune responses thus accelerating bacterial  
6 clearance from the system.  
7  
8  
9  
10

11  
12 Metformin has an inhibitory effect on mitochondrial complex I, inhibition of which has  
13 been found to increase the AMP/ATP ratio [13, 14]. The altered cellular energy status induces  
14 activation of AMP-activated protein kinase (AMPK), a serine/threonine kinase, and acts as an  
15 energy sensor [15]. Activation of AMPK by metformin stimulates endothelial nitric oxide  
16 synthase (eNOS) activity which leads to bacterial killing [16]. Metformin also acts through  
17 AMPK-independent mechanisms. It promotes phagocytosis, phago-lysosome fusion &  
18 autophagy in macrophages. Macrophages exposed to metformin had higher bactericidal capacity  
19 attributed to increased mitochondrial Reactive Oxidative Species (ROS) production required for  
20 bacterial killing [17]. Since 90% of the newly diagnosed sputum positive patients are sensitive to  
21 isoniazid (H) and rifampicin (R), it is assumed that adding the drug metformin would have an  
22 added beneficial effect in terms of early killing of intracellular bacteria by influencing the host  
23 immunity. Experiments in mice with MET (500 mg/kg) alone have shown reduced bacillary load  
24 in both lung and spleen which is equivalent to a MET dose of 2430 mg/day for a 60-kg human  
25 [18]. High dose of metformin has also been used in clinical practice for management of diabetic  
26 individuals with and without TB and also in non-diabetic conditions like polycystic ovarian  
27 syndrome and obesity [19, 20].  
28  
29  
30  
31  
32  
33  
34  
35  
36  
37  
38  
39  
40  
41  
42  
43  
44  
45  
46  
47  
48  
49

50 We are proposing a Phase IIB trial looking at sputum-culture conversion to negative over  
51 a 2-month period as studies have shown a correlation between positive 2-month sputum-culture  
52 status and subsequent relapse. However, limitations of this design include the binary outcome of  
53  
54  
55  
56  
57

1  
2  
3 2-month sputum-culture end point, hence requiring larger samples size to prove the benefit. To  
4  
5 overcome this limitation we plan serial sputum colony counting (SSCC) and time-to-detection  
6  
7 (TTD). SSCC employs quantitative sputum cultures measured at several time points over a 2-  
8  
9 month period. These measurements allow for the calculation of time to stable culture conversion  
10  
11 as well as change in CFU/ml/day, a longitudinal continuous variable with greater power  
12  
13 compared with the binary culture conversion [21]. TTD in liquid culture may offer a potential  
14  
15 alternative to SSCC and the problems of quantitative cultures, by replacing CFU counting with  
16  
17 the automated measurement of TTD during the 8-week period. In our study, the outcome  
18  
19 measures of interest (primarily bacteriological) is based on objective microbiology and the  
20  
21 bacteriology laboratory staff will be blinded to the patient's treatment. Safety assessments will be  
22  
23 defined as objectively as possible, using pre-defined grading criteria for laboratory abnormalities  
24  
25 and adverse events. The pharmacokinetic aspect of the study is based on a population approach  
26  
27 which is facilitated by the intensive-sparse sampling design thus enabling pharmacokinetic  
28  
29 exposure (AUC<sub>0-24</sub>) to be estimated for all participants in the study. Several alternative  
30  
31 biomarkers of treatment response are also being evaluated using these samples.  
32  
33  
34  
35  
36  
37

38  
39 Results from METRIF study will complement observations from other retrospective and  
40  
41 case-control studies that showed metformin to be a protective agent against TB infection among  
42  
43 diabetics [22, 23]. As studies did not show any dose-dependent protection in metformin users for  
44  
45 TB, we will be using 500mg dose for the first week followed by 1000mg for the remaining 7-  
46  
47 weeks. This dose escalation is being done to reduce the gastrointestinal side effects of  
48  
49 metformin. If the study regimen is successful, it will pave way to evaluate shorter regimens for  
50  
51 the treatment of PTB. This is expected to provide a new standard of care for DS-PTB which  
52  
53 would cut down the number of required clinic visits and the burden on the health care system and  
54  
55  
56  
57

1  
2  
3 could also decrease the percentage of patients who fail to complete the full course of current  
4 longer therapy. If the study regimens are shown to be non-inferior or superior to the control  
5 regimen, that would represent an even greater advance for patients with DS-PTB and TB control  
6 programmes globally.  
7  
8  
9  
10  
11  
12  
13  
14  
15  
16  
17  
18  
19  
20  
21  
22  
23  
24  
25  
26  
27  
28  
29  
30  
31  
32  
33  
34  
35  
36  
37  
38  
39  
40  
41  
42  
43  
44  
45  
46  
47  
48  
49  
50  
51  
52  
53  
54  
55  
56  
57  
58  
59  
60

For peer review only

**REFERENCES**

1. Global Tuberculosis Report 2017. World Health Organization. Geneva. Accessed from [http://www.who.int/tb/publications/global\\_report/en/](http://www.who.int/tb/publications/global_report/en/)
2. Kuijl C, Savage ND, Marsman N, et al. Intracellular bacterial growth is controlled by a kinase network around PKB/AKT1. *Nature* 2007; 450 (7170): 725-30.
3. Ejim L, Farha MA, Falconer SB, et al. Combinations of antibiotics and non-antibiotic drugs enhance antimicrobial efficacy. *Nat. Chem. Biol.* 2011; 7, 348–350.
4. Bhatt K, Salgame P. Host innate immune response to *Mycobacterium tuberculosis*. *J. Clin. Immunol.* 2007; 27, 347–362.
5. Behar SM, Divangahi M, Remold H. Evasion of innate immunity by *Mycobacterium tuberculosis*: Is death an exit strategy? *Nat. Rev. Microbiol.* 2010; 8, 668–674
6. Gutierrez MG, Master SS, Singh SB et al. Autophagy is a defense mechanism inhibiting BCG and *Mycobacterium tuberculosis* survival in infected macrophages. *Cell* 2004; 119, 753–766.
7. Kim J, Kundu M, Viollet B, et al AMPK and mTOR regulate autophagy through direct phosphorylation of Ulk1. *Nat. Cell Biol.* 2011; 13, 132–141.
8. Kumar D, Nath L, Kamal MA et al. Genome-wide analysis of the host intracellular network that regulates survival of *Mycobacterium tuberculosis*. *Cell* 2010; 140, 731–743.
9. Singhal A, Jie L, Kumar P et al. Metformin as adjunct antituberculosis therapy. *Science Translational Medicine* 2014; 6: 263
10. Wang JY, Wang JT, Tsai TH et al. Adding moxifloxacin is associated with a shorter time to culture conversion in pulmonary tuberculosis. *Int J Tuberc Lung Dis* 2010; 14(1): 65-71.
11. Division of AIDS (DAIDS) Table for Grading the Severity of Adult and Pediatric Adverse Events. Version 2.1, March 2017. Accessed on 29<sup>th</sup> march 2018. Available from <https://rsc.tech-res.com/docs/default-source/safety/daids-ae-grading-table-mar2017.pdf>
12. Fox W, Ellard GA, Mitchison DA. Studies on the treatment of tuberculosis undertaken by the British Medical Research Council tuberculosis units, 1946–1986, with relevant subsequent publications. *Int J Tuberc Lung Dis.* 1999;3(10):S231–79.
13. El-Mir MY, Nogueira V, Fontaine E, et al. Dimethylbiguanide inhibits cell respiration via an indirect effect targeted on the respiratory chain complex I. *J Biol Chem.* 2000; 275:223–8.

14. Owen MR, Doran E, Halestrap AP. Evidence that metformin exerts its antidiabetic effects through inhibition of complex 1 of the mitochondrial respiratory chain. *Biochem J.* 2000; 348: 607–14.
15. Hardie DG. The AMP-activated protein kinase pathway: new players upstream and downstream. *J Cell Sci.*2004; 117: 5479–87.
16. Davis BJ, Xie Z, Viollet B, et al. Activation of the AMP-activated kinase by anti-diabetes drug metformin stimulates nitric oxide synthesis in vivo by promoting the association of heat shock protein 90 and endothelial nitric oxide synthase. *Diabetes.*2006; 55: 496– 505.
17. Hor-Yue Tan, Ning Wang, Sha Li, Ming Hong, Xuanbin Wang, Yibin Feng. The Reactive Oxygen Species in Macrophage Polarization: Reflecting Its Dual Role in Progression and Treatment of Human Diseases. *Oxid Med Cell Longev.* 2016; 2016: 2795090.
18. Reigner BG, Blesch KS. Estimating the starting dose for entry into humans: Principles and practice. *Eur J Clin Pharmacol* 2002; 57: 835-845
19. Lord JM, Flight IHK, Norman RJ. Metformin in polycystic ovary syndrome: Systematic review and meta-analysis. *Br Med J* 2003; 327: 951
20. Levri KM, Sllaymaker E, last A et al. Metformin as treatment for overweight and obese adults. *Ann Fam med* 2005; 3 (5): 457-461
21. Bark CM, Furin JJ, Johnson JL. Approaches to clinical trials of new anti-TB drugs *Clin. Invest.* (2012) 2(4), 359–370
22. Sullivan T, Amor BY. The co-management of tuberculosis and diabetes: Challenges and opportunities in the developing world. *PLOS Med.* 2012; 9, e1001269.
23. Marupuru S, Senapati P, Pathadka S et al. Protective effect of metformin against tuberculosis infections in diabetic patients: an observational study of south Indian tertiary healthcare facility. *Braz J Infect Dis* 2017; 21(3): 312-316



- 1  
2  
3  
4  
5  
6  
7  
8  
9  
10  
11  
12  
13  
14  
15  
16  
17  
18  
19  
20  
21  
22  
23  
24  
25  
26  
27  
28  
29  
30  
31  
32  
33  
34  
35  
36  
37  
38  
39  
40  
41  
42  
43  
44  
45  
46  
47  
48  
49  
50  
51  
52  
53  
54  
55  
56  
57  
58  
59  
60
- **Authors' contributions:** CPP& SS – conceived & designed the study / CPP, PKB, MN, CPR, HK, NSG, RG, MSJ, TB & ST & RG – development and writing of the study protocol and this manuscript
  - **Funding:** Funding for the study was provided by India TB Research Consortium- Indian Council of Medical Research, New Delhi and Open Source Pharma Foundation, Bangalore, India. Trial Sponsor: Indian Council of Medical Research – National Institute for Research in Tuberculosis
  - **Competing interests:** None

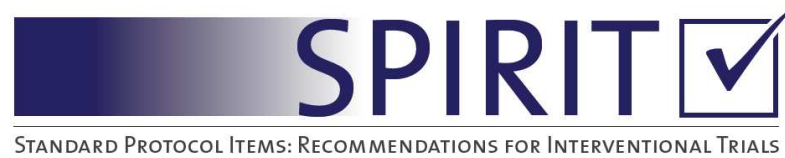

SPIRIT 2013 Checklist: Recommended items to address in a clinical trial protocol and related documents\*

| Section/item                      | Item No | Description                                                                                                                                                                                                                                                                              | Addressed on page number |
|-----------------------------------|---------|------------------------------------------------------------------------------------------------------------------------------------------------------------------------------------------------------------------------------------------------------------------------------------------|--------------------------|
| <b>Administrative information</b> |         |                                                                                                                                                                                                                                                                                          |                          |
| Title                             | 1       | Descriptive title identifying the study design, population, interventions, and, if applicable, trial acronym                                                                                                                                                                             | ___ 1 ___                |
| Trial registration                | 2a      | Trial identifier and registry name. If not yet registered, name of intended registry                                                                                                                                                                                                     | ___ 3 ___                |
|                                   | 2b      | All items from the World Health Organization Trial Registration Data Set                                                                                                                                                                                                                 | ___ - ___                |
| Protocol version                  | 3       | Date and version identifier                                                                                                                                                                                                                                                              | ___ 15 ___               |
| Funding                           | 4       | Sources and types of financial, material, and other support                                                                                                                                                                                                                              | ___ 15 ___               |
| Roles and responsibilities        | 5a      | Names, affiliations, and roles of protocol contributors                                                                                                                                                                                                                                  | ___ 16 ___               |
|                                   | 5b      | Name and contact information for the trial sponsor                                                                                                                                                                                                                                       | ___ 16 ___               |
|                                   | 5c      | Role of study sponsor and funders, if any, in study design; collection, management, analysis, and interpretation of data; writing of the report; and the decision to submit the report for publication, including whether they will have ultimate authority over any of these activities | ___ 16 ___               |
|                                   | 5d      | Composition, roles, and responsibilities of the coordinating centre, steering committee, endpoint adjudication committee, data management team, and other individuals or groups overseeing the trial, if applicable (see Item 21a for data monitoring committee)                         | ___ 12 ___               |

1  
2  
3  
4  
5  
6  
7  
8  
9  
10  
11  
12  
13  
14  
15  
16  
17  
18  
19  
20  
21  
22  
23  
24  
25  
26  
27  
28  
29  
30  
31  
32  
33  
34  
35  
36  
37  
38  
39  
40  
41  
42  
43  
44  
45  
46  
47

**Introduction**

|                          |    |                                                                                                                                                                                                           |   |
|--------------------------|----|-----------------------------------------------------------------------------------------------------------------------------------------------------------------------------------------------------------|---|
| Background and rationale | 6a | Description of research question and justification for undertaking the trial, including summary of relevant studies (published and unpublished) examining benefits and harms for each intervention        | 4 |
|                          | 6b | Explanation for choice of comparators                                                                                                                                                                     | 5 |
| Objectives               | 7  | Specific objectives or hypotheses                                                                                                                                                                         | 5 |
| Trial design             | 8  | Description of trial design including type of trial (eg, parallel group, crossover, factorial, single group), allocation ratio, and framework (eg, superiority, equivalence, noninferiority, exploratory) | 5 |

**Methods: Participants, interventions, and outcomes**

|                      |     |                                                                                                                                                                                                                                                                                                                                                                                |         |
|----------------------|-----|--------------------------------------------------------------------------------------------------------------------------------------------------------------------------------------------------------------------------------------------------------------------------------------------------------------------------------------------------------------------------------|---------|
| Study setting        | 9   | Description of study settings (eg, community clinic, academic hospital) and list of countries where data will be collected. Reference to where list of study sites can be obtained                                                                                                                                                                                             | 6       |
| Eligibility criteria | 10  | Inclusion and exclusion criteria for participants. If applicable, eligibility criteria for study centres and individuals who will perform the interventions (eg, surgeons, psychotherapists)                                                                                                                                                                                   | 6       |
| Interventions        | 11a | Interventions for each group with sufficient detail to allow replication, including how and when they will be administered                                                                                                                                                                                                                                                     | 6 & 7   |
|                      | 11b | Criteria for discontinuing or modifying allocated interventions for a given trial participant (eg, drug dose change in response to harms, participant request, or improving/worsening disease)                                                                                                                                                                                 | 10      |
|                      | 11c | Strategies to improve adherence to intervention protocols, and any procedures for monitoring adherence (eg, drug tablet return, laboratory tests)                                                                                                                                                                                                                              | 10      |
|                      | 11d | Relevant concomitant care and interventions that are permitted or prohibited during the trial                                                                                                                                                                                                                                                                                  | 10      |
| Outcomes             | 12  | Primary, secondary, and other outcomes, including the specific measurement variable (eg, systolic blood pressure), analysis metric (eg, change from baseline, final value, time to event), method of aggregation (eg, median, proportion), and time point for each outcome. Explanation of the clinical relevance of chosen efficacy and harm outcomes is strongly recommended | 11      |
| Participant timeline | 13  | Time schedule of enrolment, interventions (including any run-ins and washouts), assessments, and visits for participants. A schematic diagram is highly recommended (see Figure)                                                                                                                                                                                               | 12 & 20 |

1  
2  
3 Sample size 14 Estimated number of participants needed to achieve study objectives and how it was determined, including \_\_\_\_\_12\_\_\_\_\_  
4 clinical and statistical assumptions supporting any sample size calculations

5  
6 Recruitment 15 Strategies for achieving adequate participant enrolment to reach target sample size \_\_\_\_\_9\_\_\_\_\_  
7

8 **Methods: Assignment of interventions (for controlled trials)**  
9

10 Allocation:

11  
12 Sequence generation 16a Method of generating the allocation sequence (eg, computer-generated random numbers), and list of any \_\_\_\_\_12\_\_\_\_\_  
13 factors for stratification. To reduce predictability of a random sequence, details of any planned restriction  
14 (eg, blocking) should be provided in a separate document that is unavailable to those who enrol participants  
15 or assign interventions  
16

17 Allocation concealment 16b Mechanism of implementing the allocation sequence (eg, central telephone; sequentially numbered, \_\_\_\_\_12\_\_\_\_\_  
18 opaque, sealed envelopes), describing any steps to conceal the sequence until interventions are assigned  
19 mechanism  
20

21 Implementation 16c Who will generate the allocation sequence, who will enrol participants, and who will assign participants to \_\_\_\_\_12\_\_\_\_\_  
22 interventions  
23

24 Blinding (masking) 17a Who will be blinded after assignment to interventions (eg, trial participants, care providers, outcome \_\_\_\_\_-\_\_\_\_\_  
25 assessors, data analysts), and how  
26

27 17b If blinded, circumstances under which unblinding is permissible, and procedure for revealing a participant's \_\_\_\_\_-\_\_\_\_\_  
28 allocated intervention during the trial  
29  
30

31 **Methods: Data collection, management, and analysis**  
32

33 Data collection methods 18a Plans for assessment and collection of outcome, baseline, and other trial data, including any related \_\_\_\_\_13\_\_\_\_\_  
34 processes to promote data quality (eg, duplicate measurements, training of assessors) and a description of  
35 study instruments (eg, questionnaires, laboratory tests) along with their reliability and validity, if known.  
36 Reference to where data collection forms can be found, if not in the protocol  
37

38 18b Plans to promote participant retention and complete follow-up, including list of any outcome data to be \_\_\_\_\_  
39 collected for participants who discontinue or deviate from intervention protocols  
40  
41  
42

1  
2  
3 Data management 19 Plans for data entry, coding, security, and storage, including any related processes to promote data quality \_\_\_13\_\_\_  
4 (eg, double data entry; range checks for data values). Reference to where details of data management  
5 procedures can be found, if not in the protocol  
6  
7 Statistical methods 20a Statistical methods for analysing primary and secondary outcomes. Reference to where other details of the \_\_\_13\_\_\_  
8 statistical analysis plan can be found, if not in the protocol  
9  
10 20b Methods for any additional analyses (eg, subgroup and adjusted analyses) \_\_\_13\_\_\_  
11  
12 20c Definition of analysis population relating to protocol non-adherence (eg, as randomised analysis), and any  
13 statistical methods to handle missing data (eg, multiple imputation) \_\_\_-\_\_\_  
14

15 **Methods: Monitoring**

16  
17 Data monitoring 21a Composition of data monitoring committee (DMC); summary of its role and reporting structure; statement of \_\_\_13\_\_\_  
18 whether it is independent from the sponsor and competing interests; and reference to where further details  
19 about its charter can be found, if not in the protocol. Alternatively, an explanation of why a DMC is not  
20 needed  
21  
22 21b Description of any interim analyses and stopping guidelines, including who will have access to these interim \_\_\_12\_\_\_  
23 results and make the final decision to terminate the trial  
24  
25 Harms 22 Plans for collecting, assessing, reporting, and managing solicited and spontaneously reported adverse \_\_\_13 & 14\_\_\_  
26 events and other unintended effects of trial interventions or trial conduct  
27  
28 Auditing 23 Frequency and procedures for auditing trial conduct, if any, and whether the process will be independent \_\_\_-\_\_\_  
29 from investigators and the sponsor  
30  
31

32 **Ethics and dissemination**

33  
34 Research ethics 24 Plans for seeking research ethics committee/institutional review board (REC/IRB) approval \_\_\_6\_\_\_  
35 approval  
36  
37 Protocol 25 Plans for communicating important protocol modifications (eg, changes to eligibility criteria, outcomes, \_\_\_14\_\_\_  
38 amendments analyses) to relevant parties (eg, investigators, REC/IRBs, trial participants, trial registries, journals,  
39 regulators)  
40  
41  
42  
43  
44

|    |                               |     |                                                                                                                                                                                                                                                                                     |               |
|----|-------------------------------|-----|-------------------------------------------------------------------------------------------------------------------------------------------------------------------------------------------------------------------------------------------------------------------------------------|---------------|
| 1  |                               |     |                                                                                                                                                                                                                                                                                     |               |
| 2  |                               |     |                                                                                                                                                                                                                                                                                     |               |
| 3  | Consent or assent             | 26a | Who will obtain informed consent or assent from potential trial participants or authorised surrogates, and how (see Item 32)                                                                                                                                                        | _____7_____   |
| 4  |                               |     |                                                                                                                                                                                                                                                                                     |               |
| 5  |                               |     |                                                                                                                                                                                                                                                                                     |               |
| 6  |                               | 26b | Additional consent provisions for collection and use of participant data and biological specimens in ancillary studies, if applicable                                                                                                                                               | _____7_____   |
| 7  |                               |     |                                                                                                                                                                                                                                                                                     |               |
| 8  | Confidentiality               | 27  | How personal information about potential and enrolled participants will be collected, shared, and maintained in order to protect confidentiality before, during, and after the trial                                                                                                | _____15_____  |
| 9  |                               |     |                                                                                                                                                                                                                                                                                     |               |
| 10 |                               |     |                                                                                                                                                                                                                                                                                     |               |
| 11 | Declaration of interests      | 28  | Financial and other competing interests for principal investigators for the overall trial and each study site                                                                                                                                                                       | _____18_____  |
| 12 |                               |     |                                                                                                                                                                                                                                                                                     |               |
| 13 |                               |     |                                                                                                                                                                                                                                                                                     |               |
| 14 | Access to data                | 29  | Statement of who will have access to the final trial dataset, and disclosure of contractual agreements that limit such access for investigators                                                                                                                                     | _____15_____  |
| 15 |                               |     |                                                                                                                                                                                                                                                                                     |               |
| 16 |                               |     |                                                                                                                                                                                                                                                                                     |               |
| 17 | Ancillary and post-trial care | 30  | Provisions, if any, for ancillary and post-trial care, and for compensation to those who suffer harm from trial participation                                                                                                                                                       | _____ - _____ |
| 18 |                               |     |                                                                                                                                                                                                                                                                                     |               |
| 19 |                               |     |                                                                                                                                                                                                                                                                                     |               |
| 20 | Dissemination policy          | 31a | Plans for investigators and sponsor to communicate trial results to participants, healthcare professionals, the public, and other relevant groups (eg, via publication, reporting in results databases, or other data sharing arrangements), including any publication restrictions | _____15_____  |
| 21 |                               |     |                                                                                                                                                                                                                                                                                     |               |
| 22 |                               |     |                                                                                                                                                                                                                                                                                     |               |
| 23 |                               |     |                                                                                                                                                                                                                                                                                     |               |
| 24 |                               |     |                                                                                                                                                                                                                                                                                     |               |
| 25 |                               | 31b | Authorship eligibility guidelines and any intended use of professional writers                                                                                                                                                                                                      | _____ - _____ |
| 26 |                               |     |                                                                                                                                                                                                                                                                                     |               |
| 27 |                               | 31c | Plans, if any, for granting public access to the full protocol, participant-level dataset, and statistical code                                                                                                                                                                     | _____ - _____ |
| 28 |                               |     |                                                                                                                                                                                                                                                                                     |               |
| 29 | <b>Appendices</b>             |     |                                                                                                                                                                                                                                                                                     |               |
| 30 |                               |     |                                                                                                                                                                                                                                                                                     |               |
| 31 | Informed consent materials    | 32  | Model consent form and other related documentation given to participants and authorised surrogates                                                                                                                                                                                  | _____Yes_____ |
| 32 |                               |     |                                                                                                                                                                                                                                                                                     | _____ - _____ |
| 33 |                               |     |                                                                                                                                                                                                                                                                                     |               |
| 34 | Biological specimens          | 33  | Plans for collection, laboratory evaluation, and storage of biological specimens for genetic or molecular analysis in the current trial and for future use in ancillary studies, if applicable                                                                                      | _____Yes_____ |
| 35 |                               |     |                                                                                                                                                                                                                                                                                     | _____ - _____ |
| 36 |                               |     |                                                                                                                                                                                                                                                                                     |               |

37 \*It is strongly recommended that this checklist be read in conjunction with the SPIRIT 2013 Explanation & Elaboration for important clarification on the items.  
 38 Amendments to the protocol should be tracked and dated. The SPIRIT checklist is copyrighted by the SPIRIT Group under the Creative Commons  
 39 "[Attribution-NonCommercial-NoDerivs 3.0 Unported](https://creativecommons.org/licenses/by-nc-nd/3.0/)" license.  
 40

# BMJ Open

## Evaluation of Metformin in combination with Rifampicin containing Anti-tuberculosis therapy in patients with new, smear-positive pulmonary tuberculosis (METRIF): Study protocol for a randomized clinical trial

|                                 |                                                                                                                                                                                                                                                                                                                                                                                                                                                                                                                                                                                                                                                                                                                |
|---------------------------------|----------------------------------------------------------------------------------------------------------------------------------------------------------------------------------------------------------------------------------------------------------------------------------------------------------------------------------------------------------------------------------------------------------------------------------------------------------------------------------------------------------------------------------------------------------------------------------------------------------------------------------------------------------------------------------------------------------------|
| Journal:                        | <i>BMJ Open</i>                                                                                                                                                                                                                                                                                                                                                                                                                                                                                                                                                                                                                                                                                                |
| Manuscript ID                   | bmjopen-2018-024363.R1                                                                                                                                                                                                                                                                                                                                                                                                                                                                                                                                                                                                                                                                                         |
| Article Type:                   | Protocol                                                                                                                                                                                                                                                                                                                                                                                                                                                                                                                                                                                                                                                                                                       |
| Date Submitted by the Author:   | 08-Oct-2018                                                                                                                                                                                                                                                                                                                                                                                                                                                                                                                                                                                                                                                                                                    |
| Complete List of Authors:       | Padmapriyadarsini, Chandrasekaran; National Institute for Research in Tuberculosis, P.K., Bhavani; National Institute for Research in Tuberculosis Natrajan, Mohan; National Institute for Research in Tuberculosis C, Ponnuraja; National Institute for Research in Tuberculosis Kumar, Hemanth; National Institute for Research in Tuberculosis Gomathy, N.S.; National Institute for Research in Tuberculosis Guleria, Randeep; All India Institute of Medical Sciences M.S., Jawahar; Open Source Pharma Foundation SIngh, Manjula; Indian Council of Medical Research Tanjore, Balganes; Open Source Pharma Foundation Swaminathan, Soumya; World Health Organisation; Indian Council of Medical Research |
| <b>Primary Subject Heading</b>: | Respiratory medicine                                                                                                                                                                                                                                                                                                                                                                                                                                                                                                                                                                                                                                                                                           |
| Secondary Subject Heading:      | Infectious diseases, Respiratory medicine                                                                                                                                                                                                                                                                                                                                                                                                                                                                                                                                                                                                                                                                      |
| Keywords:                       | Protocols & guidelines < HEALTH SERVICES ADMINISTRATION & MANAGEMENT, Tuberculosis < INFECTIOUS DISEASES, Respiratory infections < THORACIC MEDICINE, Clinical trials < THERAPEUTICS, PUBLIC HEALTH                                                                                                                                                                                                                                                                                                                                                                                                                                                                                                            |
|                                 |                                                                                                                                                                                                                                                                                                                                                                                                                                                                                                                                                                                                                                                                                                                |

SCHOLARONE™  
Manuscripts

1  
2  
3 **Evaluation of Metformin in combination with Rifampicin containing Anti-tuberculosis**  
4  
5 **therapy in patients with new, smear-positive pulmonary tuberculosis (METRIF):**  
6  
7 **Study protocol for a randomized clinical trial**  
8  
9

10  
11  
12 C Padmapriyadarsini<sup>1</sup>, PK Bhavani<sup>1</sup>, Mohan Natrajan<sup>1</sup>, C Ponnuraja<sup>1</sup>, Hemanth Kumar<sup>1</sup>,  
13 NS Gomathy<sup>1</sup>, Randeep Guleria<sup>2</sup>, M.S.Jawahar<sup>3</sup>, Manjula Singh<sup>4</sup>,  
14 T. Balganes<sup>3</sup>, Soumya Swaminathan<sup>4,5</sup>  
15  
16

17  
18 <sup>1</sup>ICMR National Institute for Research in Tuberculosis, Chennai

19 <sup>2</sup>AllIndia Institute for Medical Sciences, New Delhi

20 <sup>3</sup>Open Source Pharma Foundation, Bangalore

21 <sup>4</sup>Indian Council of Medical Research-India TB Research Consortium, New Delhi

22 <sup>5</sup>World Health Organization, Geneva  
23  
24  
25  
26  
27  
28  
29  
30  
31  
32  
33  
34

35 **E-mail address of Authors:**

36 **CPP:** [pcorchids@gmail.com](mailto:pcorchids@gmail.com) / **PKB:** [bhavanipk@yahoo.com](mailto:bhavanipk@yahoo.com) / **MN:** [mohan.n@nirt.res.in](mailto:mohan.n@nirt.res.in) / **CPR:**  
37 [cponnuraja@nirt.res.in](mailto:cponnuraja@nirt.res.in) / **HK:** [akhemanth20@gmail.com](mailto:akhemanth20@gmail.com) / **NSG:** [gomathisharma@nirt.res.in](mailto:gomathisharma@nirt.res.in) / **RG:**  
38 [randeepguleria2002@gmail.com](mailto:randeepguleria2002@gmail.com) / **MSJ:** [shaheedjawahar@gmail.com](mailto:shaheedjawahar@gmail.com) / **MS:** [drmanjulasb@gmail.com](mailto:drmanjulasb@gmail.com) /  
39 **TB:** [tanjores.balganes@gmail.com](mailto:tanjores.balganes@gmail.com) / **SS:** [doctorsoumya@yahoo.com](mailto:doctorsoumya@yahoo.com)  
40  
41  
42  
43  
44  
45

46 **Address for Correspondence:**

47 Dr.Padmapriyadarsini  
48 National Institute for Research in Tuberculosis  
49 No.1, Mayor Sathyamoorthy Road  
50 Chetput, Chennai 600031  
51 Phone: +91 9498022949  
52 Fax No: 04428362525  
53 e-mail: [pcorchids@gmail.com](mailto:pcorchids@gmail.com)  
54  
55  
56  
57



## Abstract

**Introduction:** Shorter duration of treatment for the management of drug-susceptible pulmonary tuberculosis (TB) would be a significant improvement in the care of patients suffering from the disease. Besides newer drugs and regimens, other modalities like host-directed therapy are also being suggested to reach this goal. This study's objective is to assess the efficacy and safety of metformin-containing anti-tuberculosis treatment (ATT) regimen in comparison to the standard 6-month ATT regimen in the treatment of newly diagnosed sputum smear positive drug-sensitive pulmonary tuberculosis patients.

**Methods and Analysis:** We are conducting a multicentric, randomized open-label controlled clinical trial to achieve the study objective. The intervention group will receive isoniazid (H), rifampicin (R), ethambutol (E) and pyrazinamide (Z) along with 1000mg of daily metformin (Met) for the first two months while the control group will receive only HRZE. After 2-months, both the groups will receive HRE daily for four months. The primary endpoint is time to sputum culture conversion. Secondary endpoints will include time to detection of *Mycobacterium tuberculosis* in sputum, pharmacokinetics, and pharmacogenomics of study drugs, drug-drug interactions, safety and tolerability of the various combinations and measurement of autophagy and immune responses in the study participants.

**Ethics and Dissemination:** The Ethics committee of the participating institutes have approved the study. Results from this trial will contribute to evidence towards constructing a shorter, effective and safe regimen for TB patients. The results will be shared widely with the National Programme managers, policymakers, and stakeholders through open access publications, dissemination meetings, conference abstracts and policy briefs. This is expected to provide a new

1  
2  
3 standard of care for drug-sensitive pulmonary TB patients who will not only reduce the number  
4  
5 of clinic visits and lost to follow-up of patients from treatment but also reduce the burden on the  
6  
7 health care system.  
8  
9

10 **Trial Registration:** The protocol has been registered on Clinical Trial Registry of India with  
11  
12 identifier CTRI/2018/01/011176 on January 8<sup>th</sup>, 2018.  
13  
14

15  
16  
17 **Strength and Limitations:**  
18

- 19 • Study design, randomized controlled clinical trial, will add considerable power to the  
20  
21 study results and conclusion by decreasing bias (selection bias & observer bias) and  
22  
23 minimizing confounding of unequal distribution.  
24  
25
- 26 • This study design of randomized controlled clinical trial with stratification will also  
27  
28 control of group allocation, enhancing similarity of baseline features including disease  
29  
30 severity in the two study arms. This will help us in subgroup analysis improving  
31  
32 usefulness for clinical practice  
33  
34
- 35 • Due to the strict exclusion and inclusion criteria of the clinical trial, the results from the  
36  
37 clinical trial may not be generalizable to all groups of TB patients.  
38  
39
- 40 • Due to the multicentric nature of the study, the heterogeneity of data may be present  
41  
42
- 43 • Relapse rates may not be known in this trial as the study duration is only for six months  
44  
45 of treatment as per the study objective  
46  
47

48 **Keywords:** Metformin, Pulmonary Tuberculosis, Clinical trial, Short-course therapy, TB  
49  
50 treatment  
51  
52  
53  
54  
55  
56  
57

## Introduction:

Globally in 2016, there were an estimated 10.4 million new cases of tuberculosis (TB) with five countries, India, Indonesia, China, Philippines, and Pakistan accounting for 56% of the total cases [1]. There were an estimated 1.3 million TB deaths in 2016 among HIV-negative people and an additional 374000 deaths among people living with HIV [1]. Though effective regimens are available for the treatment of drug-sensitive TB with more than 95% cure, the long duration of such regimens has posed problems for TB treatment and control. This, along with drug toxicity results in poor adherence to treatment resulting in the emergence of drug resistance.

The global need for new effective therapies has led to a resurgence in efforts to identify additional anti-*M.tb* agents, several of which are now being evaluated in clinical trials. However, conventional pathogen-targeted strategies suffer from the severe disadvantage of fostering microbial resistance. To circumvent this problem, a new paradigm in drug discovery has emerged that involves therapeutic modulation of the host immune responses which leads to better and faster pathogen elimination [2, 3].

A competent host immune system is a crucial factor for both the control and containment of *M.tb* growth. *M.tb* can evade host innate as well as adaptive immune responses and succeed in infecting the host cells and maintaining long-term persistent infection [4, 5]. “Host-targeted” adjunct therapeutic strategies not only augment protective host immune responses but also reduce the chance of development of microbial resistance.

One among the host cell innate antimicrobial arsenal includes the capacity to destroy intracellular pathogens using the phagosomal machinery or autophagy pathway. Intracellular pathogens are effectively controlled by autophagy that is regulated by adenosine monophosphate-activated protein kinase (AMPK) [6, 7]. The *M.tb* virulence results from

1  
2  
3 perturbations in the autophagy network and AMPK signaling [8]. The antidiabetic drug  
4 Metformin (MET; 1,1-dimethyl biguanide), is an AMPK modulator that inhibits the intracellular  
5 growth of *M.tb*, restricts disease immunopathology, and enhances the efficacy of conventional  
6 anti-TB drug [9]. Given these promising findings, we plan to test whether the existing approved  
7 anti-diabetic drug, Metformin added to existing anti-TB regimen, with its defined effects on host  
8 cell functions could be repurposed for effective and faster treatment of TB as compared to the  
9 current standard of care anti-TB regimens.  
10  
11  
12  
13  
14  
15  
16  
17  
18

19 The Primary objective of this study– the METRIF study- is to study the antibacterial  
20 activity, in terms of time to sputum culture conversion of metformin-containing anti-tuberculosis  
21 treatment (ATT) regimen instituted during the initial 8-weeks of treatment in patients with newly  
22 diagnosed sputum smear-positive pulmonary TB. Secondary objectives of the study are:  
23  
24  
25  
26  
27

- 28 i. to compare the time to detection (TTD) of *M.tb* in culture in the group  
29 receiving metformin-containing regimen with the control group receiving ATT  
30 alone.  
31  
32  
33
- 34 ii. To study the autophagy enhancing effect and host immune responses in the  
35 two groups,  
36  
37  
38
- 39 iii. To examine the post-dosing serum concentration of anti-TB drugs and  
40 metformin, their interactions and the impact of genomics - on these parameters  
41 (pharmacokinetics (PK) and pharmacogenomics) and  
42  
43  
44
- 45 iv. To evaluate the safety and tolerability of metformin by measuring the  
46 incidence of Treatment-Emergent Adverse Events.  
47  
48  
49  
50  
51  
52  
53  
54  
55  
56  
57

## Methods and Analysis

Study Design and oversight: METRIF is a multi-site, randomized, open-labeled, parallel arm, controlled clinical trial comparing the time to sputum culture conversion among patients with pulmonary TB receiving ATT with metformin (experimental arm) compared to those receiving ATT alone (control arm). The study is randomizing 316 participants to one of the two treatment arms in a 1:1 allocation. The study is sponsored by the India TB Research Consortium of the Indian Council of Medical Research and Open Source Pharma Foundation and implemented by the National Institute of Research in Tuberculosis (NIRT), together with other specialized institutes. The Institutional ethics committee of NIRT has approved the study (NIRT-IEC ID: 2017030, dated 14<sup>th</sup> December 2017) and National AIDS Research Institute (NARI) (NARI EC / 2018-10 dated 16th February 2018) and will begin enrollment tentatively by 15<sup>th</sup> June 2018.

Study setting: We will implement METRIF study at three sites in India - NIRT, Chennai and its satellite centers in Madurai and Vellore; All India Institute of Medical Sciences, New Delhi, and, NARI, Pune. These sites will recruit study participants from academic institutions/hospitals as well as community clinics.

Study patients and eligibility: Adult patients, previously untreated and newly diagnosed as pulmonary TB with at least two sputum smear sample, collected on two different occasions, positive for acid-fast bacilli and susceptible to rifampicin detected by cartridge-based nucleic acid amplification test will be eligible for the study. Table 1 provides the detailed inclusion and exclusion criteria. Patients who meet these criteria at presentation and attending the identified study sites will be approached to participate in the study.

**Table 1: Eligibility Criteria**

| Inclusion Criteria                                                                                      | Exclusion Criteria                                                                                                                                                                     |
|---------------------------------------------------------------------------------------------------------|----------------------------------------------------------------------------------------------------------------------------------------------------------------------------------------|
| age 18 years and above                                                                                  | Is pregnant or breastfeeding                                                                                                                                                           |
| Is willing to undergo HIV testing                                                                       | Has extra-pulmonary TB or drug-resistant TB                                                                                                                                            |
| Has body weight between 30kg - 65kg                                                                     | Has body weight < 30 kgs or > 65 kgs                                                                                                                                                   |
| Patient has never received treatment with multidrug anti-TB therapy for more than a week.               | Has a prior history of exposure to anti-TB treatment for more than a week                                                                                                              |
| Is willing to use an effective contraceptive method during the study period                             | Has a history of liver disease or current amino alanine transferase greater than three times the upper limit of normal or total bilirubin concentration greater than 2.5 times the ULN |
| Is willing to attend a treatment center for supervised treatment and remain within the study area limit | Is serology positive for hepatitis B virus surface antigen or hepatitis C virus antibody                                                                                               |
| Is willing to sign the informed consent form and adhere to trial procedures and follow-up               | Has concomitant psychiatric illness or seizures                                                                                                                                        |
| Consents for Home visits by the study team                                                              | Has concomitant diabetes mellitus or random blood sugar > 200mg or fasting blood sugar >140 mg/dl                                                                                      |
|                                                                                                         | Has serum creatinine >1.2 mg/dl or blood urea >43 mg/dl                                                                                                                                |

Study regimen and Drug dosing: We will randomly assign eligible patients who have provided written informed consent to one of the study regimens in a ratio of 1:1. The site Principal Investigator or his/her nominee who is capable of answering all the trial-related questions from the participants will obtain the study consent. Study participation will last six months: during the first two months, participants will receive the randomly assigned regimen of either daily ATT with metformin or only ATT.

1) Test regimen – Metformin + Isoniazid + Rifampicin+ Pyrazinamide + Ethambutol daily [2MetHREZ<sub>7</sub>] or

2) Control regimen – Isoniazid+ Rifampicin + Pyrazinamide + Ethambutol daily [2HRZE<sub>7</sub>]

After 2-months, all study participants in both the arms will receive the standard 4-month continuation phase of HRE daily. Treatment will be supervised and directly observed at a health facility or by directly observed therapy (DOT) provider. Metformin will be dosed at 500 mg once daily for the 1<sup>st</sup> week and then 1000mg once daily for the remaining period of 7 weeks. Dosing of the other anti-TB drugs will be based on weight bands as shown in table 2.

We will centrally procure all drugs (H, R, E, Z, and Met) to be used in the trial, check for their stated content by validated methods using High-Performance Liquid Chromatography at NIRT Clinical pharmacology department, before dispatching it to the enrolling sites for administration to patients.

**Table 2: Weight-based dosing of anti-tuberculosis drugs**

| Weight Band | Isoniazid | Rifampicin | Pyrazinamide | Ethambutol |
|-------------|-----------|------------|--------------|------------|
| 30-39 kg    | 150 mg    | 300 mg     | 800 mg       | 550 mg     |
| 40-54 kg    | 225 mg    | 450 mg     | 1200 mg      | 825 mg     |
| 55-65 kg    | 300 mg    | 600 mg     | 1600 mg      | 1100 mg    |

1  
2  
3 Treatment allocation: Permuted block Randomization will be done centrally using a  
4 computer-generated list of random numbers, stratified by presence or absence of cavities in chest  
5 x-ray and highest sputum smear grading at baseline ( $<2$  or  $\geq 2$ ). Separate randomization lists for  
6 each combination of strata for each site will be prepared in advance by an independent  
7 statistician, using varying block sizes. Allocation codes will be generated at the central location  
8 and at the time of patient's admission to the study, the primary statistician through e-mail will  
9 inform the site the regimen based on appropriate stratification factors.  
10  
11  
12  
13  
14  
15  
16  
17  
18

19 Recruitment process: We will screen all newly diagnosed sputum smear-positive  
20 pulmonary TB patients attending the chest clinics at the study sites for study eligibility. Table 3  
21 details the various study procedures. At their first visit, the study will be explained, including the  
22 potential risks and benefits associated with participation. We will obtain informed written  
23 consent before any protocol-specific screening procedures are carried out. Consenting  
24 participants will undergo sputum testing for smear, culture (both solid and liquid media) and  
25 rifampicin resistance testing by GeneXpert. Blood samples will be obtained for HIV antibodies  
26 (unless the patient is already known to be HIV positive), liver and renal function tests and blood  
27 sugar levels. Patients will be re-assessed for eligibility when returning with their investigation  
28 results. Those patients who do not have rifampicin resistance and are willing to take part in the  
29 study will sign an enrolment consent form (or a thumb-print in the presence of a witness, if  
30 illiterate), and randomized to one of the study regimens. During the first two months of  
31 treatment, all patients will undergo weekly sputum testing for *M.tb* by smear, liquid, and solid  
32 cultures and sparse pharmacokinetics of ATT drugs and metformin. A subset of patients will  
33 undergo intense pharmacokinetic study. Randomized patients have an additional blood  
34 investigation for immunological and autophagy biomarkers (T-cell, monocyte & dendritic cell  
35  
36  
37  
38  
39  
40  
41  
42  
43  
44  
45  
46  
47  
48  
49  
50  
51  
52  
53  
54  
55  
56  
57  
58  
59  
60



1  
2  
3 functions both ex-vivo and following stimulation with TB antigens including PPD and ESAT-  
4  
5 6/CFP-10, estimation of CRP, TNF- $\alpha$ , and other cytokines) pre and post metformin containing  
6  
7 ATT.  
8  
9

10 We will refer patients ineligible or unwilling to participate in the study to the national  
11  
12 programme for treatment as per the existing guidelines.  
13  
14  
15  
16  
17  
18  
19  
20  
21  
22  
23  
24  
25  
26  
27  
28  
29  
30  
31  
32  
33  
34  
35  
36  
37  
38  
39  
40  
41  
42  
43  
44  
45  
46  
47  
48  
49  
50  
51  
52  
53  
54  
55  
56  
57  
58  
59  
60

For peer review only

1  
2  
3  
4  
5  
6  
7  
8  
9  
10  
11  
12  
13  
14  
15  
16  
17  
18  
19  
20  
21  
22  
23  
24  
25  
26  
27  
28  
29  
30  
31  
32  
33  
34  
35  
36  
37  
38  
39  
40  
41  
42  
43  
44  
45  
46  
47

**Table 3: Study schedule of enrolment, interventions, and assessments.**

|     |                                                             | STUDY PERIOD   |            |                                       |     |     |     |     |     |     |     |                                               |     |     |     |           |   |
|-----|-------------------------------------------------------------|----------------|------------|---------------------------------------|-----|-----|-----|-----|-----|-----|-----|-----------------------------------------------|-----|-----|-----|-----------|---|
|     |                                                             | ENROLMENT      | ALLOCATION | INTENSIVE PHASE OF ATT (TRIAL PERIOD) |     |     |     |     |     |     |     | CONTINUATION PHASE OF ATT (POST-TRIAL PERIOD) |     |     |     | CLOSE OUT |   |
| I   | ENROLMENT                                                   | Baseline (-D7) | W 0        | W 1                                   | W 2 | W 3 | W 4 | W 5 | W 6 | W 7 | W 8 | M 3                                           | M 4 | M 5 | M 6 | M 7       |   |
| 1   | Informed consent                                            | x              |            |                                       |     |     |     |     |     |     |     |                                               |     |     |     |           |   |
| 2   | Eligibility Screen (including lab tests)                    | x              |            |                                       |     |     |     |     |     |     |     |                                               |     |     |     |           |   |
| 3   | Sputum Gene Xpert                                           | x              |            |                                       |     |     |     |     |     |     |     |                                               |     |     |     |           |   |
| 4   | HIV, Hepatitis B & C                                        | x              |            |                                       |     |     |     |     |     |     |     |                                               |     |     |     |           |   |
| II. | ALLOCATION                                                  |                | x          |                                       |     |     |     |     |     |     |     |                                               |     |     |     |           |   |
| III | TRIAL REGIMENS                                              |                |            |                                       |     |     |     |     |     |     |     |                                               |     |     |     |           |   |
|     | Test Regimen (Metformin containing ATT)                     |                | x          | x                                     | x   | x   | x   | x   | x   | x   | x   |                                               |     |     |     |           |   |
|     | Control regimen (Only ATT)                                  |                |            | x                                     | x   | x   | x   | x   | x   | x   | x   |                                               |     |     |     |           |   |
|     | Continuation Phase of ATT (For both groups)                 |                |            |                                       |     |     |     |     |     |     |     | x                                             | x   | x   | x   |           |   |
| IV  | ASSESSMENTS                                                 |                |            |                                       |     |     |     |     |     |     |     |                                               |     |     |     |           |   |
| 1   | Clinical Evaluation                                         | x              | x          | x                                     | x   | x   | x   | x   | x   | x   | x   | x                                             | x   | x   | x   | x         |   |
| 2   | Sociological Assessment                                     | x              | x          |                                       |     |     | x   |     |     |     | x   | x                                             | x   | x   | x   | x         |   |
| 3   | Sputum smear & culture (MGIT, LJ)                           | x              |            | x                                     | x   | x   | x   | x   | x   | x   | x   | x                                             | x   | x   | x   |           |   |
| 4   | Urine Pregnancy tests / Sugar / Alb                         | x              |            |                                       |     |     | x   |     |     |     | x   | x                                             | x   | x   |     |           |   |
| 5   | HbA1c                                                       | x              |            |                                       |     |     |     |     |     |     | x   |                                               |     |     | x   |           |   |
| 6   | CBC, LFT, RFT, Lactic acid , peripheral smear & chest x-ray | x              |            |                                       |     |     | x   |     |     |     | x   |                                               |     |     | x   |           |   |
| 7   | Random blood sugar                                          | x              |            |                                       | x   |     | x   |     | x   |     | x   |                                               |     |     | x   |           |   |
| 8   | Pharmacokinetics & genomics                                 |                |            |                                       |     |     | x   |     |     |     | x   |                                               |     |     |     |           |   |
| 9   | Immunological studies                                       |                | x          |                                       |     |     |     |     |     |     | x   |                                               |     |     | x   |           |   |
| 10  | Storage Plasma/cell sample                                  |                | x          |                                       |     |     | x   |     |     |     | x   |                                               |     |     | x   |           |   |
| V   | OUTCOMES                                                    |                |            |                                       |     |     |     |     |     |     |     |                                               |     |     |     |           | x |

1  
2  
3 Treatment delivery, compliance, and retention: ATT will be administered under direct  
4 observation for 6-days of the week and supplied for the seventh day. Study staff will reinforce  
5 the importance of adherence to the treatment schedule at each visit. If the patient misses drug  
6 doses in the intensive phase (IP) or continuation phase (CP), it will be compensated at the end of  
7 the respective stages over next 15 days, so that the patient receives 60 doses of the assigned  
8 regimen in the IP and 120 doses in the CP. Treatment supporters and enablers will facilitate  
9 retention of the participants in the study. All treatment is ambulatory and delivered by dedicated  
10 DOT provider. We will assess treatment adherence through reviews of treatment card throughout  
11 the treatment phase. In case of drug supply for any reason, empty pill cover count will determine  
12 adherence. Treatment adherence will be enhanced by – reimbursing the transport costs and loss  
13 of wages incurred by the participant during the study visits. During the study period, participants  
14 will receive food supplement every month and meals during their extended, study visits.  
15  
16  
17  
18  
19  
20  
21  
22  
23  
24  
25  
26  
27  
28  
29

30 Concomitant medication while in the trial: Concomitant antibiotic treatments of any kind  
31 are discouraged during the study period. If required, their usage is restricted for a short course (<  
32 2 weeks) period. Concomitant non-antibiotic drug usage is allowed in small quantity. Only those  
33 considered necessary for the subject's welfare and are unlikely to interfere with the study  
34 medication, may be given at the discretion of the investigator. Below are the drugs used to treat  
35 *M. tb* infections which should not be used during this trial: Streptomycin, Thiacetazone, PAS,  
36 Dapsone, Amoxicillin-clavulanic acid/ clavulanate, Clofazimine, Capreomycin, any  
37 oxazolidinone antibiotic (e.g., linezolid), Ofloxacin, Levofloxacin or Moxifloxacin.  
38  
39  
40  
41  
42  
43  
44  
45  
46  
47  
48

49 Criteria for Discontinuation/ Withdrawal of study participants: Withdrawal of study  
50 participants can occur for any of the following reasons – Pregnancy, if the investigators feel that  
51 staying in the study is harmful to the patient, if the patient does not follow study procedures or is  
52  
53  
54  
55  
56  
57

1  
2  
3 not available for appointments, if the study sponsor or NIRT or representative of the Drugs  
4  
5  
6  
7  
8  
9  
10  
11  
12  
13  
14  
15  
16  
17  
18  
19  
20  
21  
22  
23  
24  
25  
26  
27  
28  
29  
30  
31  
32  
33  
34  
35  
36  
37  
38  
39  
40  
41  
42  
43  
44  
45  
46  
47  
48  
49  
50  
51  
52  
53  
54  
55  
56  
57  
58  
59  
60

not available for appointments, if the study sponsor or NIRT or representative of the Drugs  
Controller General of India decide to stop or cancel the study, if the Data and Safety Monitoring  
Board recommends halting the study or if the patient wishes to withdraw for any reasons. In such  
cases, appropriate treatment, as per the standard of care treatment available then will be ensured  
for patients taking into consideration the drug susceptibility pattern of the individual.

Study Outcomes: The primary outcome is the time to sputum culture conversion, which is  
assessed by the time interval between the date of treatment initiation and the date of acquisition  
of the first of at least two consecutive negative cultures taken at least eight days apart. We will  
also assess, on a weekly basis, the time to positivity, a change in *M.tb* log<sub>10</sub> colony forming units  
(CFU) in culture and the proportion of participants with sputum culture negativity in the two  
treatment arms.

The PK, the area under the concentration curve (AUC), will be assessed through blood sampling  
on a single day during the first month of ATT, after a minimum of seven doses of RMP and  
MET (1000mg). We will estimate the Minimum inhibitory concentration (MIC) of each  
participant's pre-treatment infecting isolate from early morning and overnight sputum samples  
collected at the pre-treatment visit. We will also compare the Genomics results of Metformin and  
Rifampicin with the plasma concentration of these drugs, bacteriological and clinical endpoints  
along with the drug-drug interaction of metformin and rifampicin.

For the occurrence of Treatment-Emergent Adverse Events (TEAEs), clinical  
investigators will grade clinical and laboratory abnormalities according to the modified Adult  
Toxicity Table for the Division of Microbiology and Infectious Diseases, National Institutes of  
Health [10]. The safety and tolerability analysis will include all patients who were randomized to  
and received at least one dose of the study regimen.

1  
2  
3 Participant Timeline: The trial will consist of three stages - Screening and enrolment (a  
4 maximum of 1 week); the Intensive phase of treatment with or without test drug (2 months)  
5 followed by a continuation phase of standard drugs (4 months). Table 3 shows the schedule of  
6 enrolment, interventions, and assessments of participants in the trial.  
7  
8  
9  
10  
11

12  
13 Patient and public involvement: Patients were not involved in the development of the  
14 research question, or the design of this study as the scientific problem is still not proven and only  
15 in the research arena. However, considering the relevance of the study outcome to public health,  
16 and policy-makers, the study is discussed in our Institutional Scientific advisory committee,  
17 Institutional Ethics committee and Community Advisory Board consisting of a representative  
18 from affected community, peers and responsible members of the society. Patients will be  
19 involved in the recruitment and conduct of the study. We will disseminate the results of the study  
20 widely through meetings, workshops, conference presentation, and publication  
21  
22  
23  
24  
25  
26  
27  
28  
29  
30  
31

32  
33 Sample Size Assumption: Published literature has shown a median time to sputum culture  
34 conversion by a liquid medium with daily ATT to be 32 days [11]. With the addition of  
35 metformin, we assumed a 30% reduction in the time to culture conversion, i.e., to approximately  
36 22 days. We estimated that we would require 150 new sputum smear-positive patients to show  
37 this difference at 80% power, an alpha level of 0.05 and a hazards ratio of 1.5. With the  
38 assumption that 5% of patients will be lost to follow-up or not assessable in the primary analysis,  
39 a total target sample size of 158 patients in each treatment arm will be recruited, totaling to 316  
40 patients for the study.  
41  
42  
43  
44  
45  
46  
47  
48  
49  
50

51 Randomization Procedures: Permuted block Randomization will be done centrally using a  
52 computer-generated list of random numbers, stratified by presence or absence of cavities on  
53 chest x-ray and highest sputum smear grading (<2 or >2). The randomization sequence will not  
54  
55  
56  
57

1  
2  
3 be available to those who enroll participants. Allocation codes will be generated at the central  
4 site, NIRT and will take place at the time of patient's admission to the study. Upon receiving an  
5 electronic-mail request from the study sites, for allocation of a participant to the study, the NIRT  
6  
7  
8  
9  
10  
11  
12  
13  
14  
15  
16  
17  
18  
19  
20  
21  
22  
23  
24  
25  
26  
27  
28  
29  
30  
31  
32  
33  
34  
35  
36  
37  
38  
39  
40  
41  
42  
43  
44  
45  
46  
47  
48  
49  
50  
51  
52  
53  
54  
55  
56  
57  
58  
59  
60

He/She will then inform the site physician, through e-mail, the study regimen along with the unique study ID for patient enrolment to the study.

*Data Collection, Management, and Interim Analysis:* Study randomization will be done centrally by the Central Data management (CDM) unit at NIRT, Chennai over e-mail. During the study conduct, data will be collected at sites at baseline and follow-up on pre-defined case record forms (CRF) and transmitted electronically to the CDM unit. Data correctness and completeness will be checked before sending. The central team will also conduct a periodic quality check of the data. Data collected will include a) improvement in disease status regarding abatement of symptoms, signs and sputum cultures conversion and b) safety and tolerability of the regimen concerning both clinical and laboratory adverse events.

During the trial all essential trial documents including the source documents, informed consent forms, etc. will be stored securely under lock and key at the recruiting sites under the supervision of the site investigator. All e-data will be password protected with limited access to the investigator and their teams alone. The study team will retain the records for a minimum period of five years after completion of the study.

The study has two interim analyses planned, viz. after 33% and 66% of the enrolled patients have completed 8-weeks of Metformin treatment and with sputum culture results available for review. The study also has an additional interim analysis for reported serious

1  
2  
3 adverse events with frequency higher than anticipated. The final analysis will include all enrolled  
4 patients when they have completed six months of ATT.  
5  
6

7  
8 Study Outcome analysis: The primary efficacy analysis will compare the median time to  
9 culture negativity. This analysis will happen when the last enrolled patient has completed eight  
10 weeks of treatment and will be done using culture results from liquid culture (MGIT) and in  
11 those who are not isoniazid or RMP mono-resistant at baseline. Both a Modified Intent to Treat  
12 (MITT) and a Per Protocol (PP) analysis will be conducted. Secondary outcome parameters will  
13 include proportion and time to sputum culture positivity using the MGIT system. The safety and  
14 tolerability analysis will consist of all patients who were randomized to and received at least one  
15 dose of the drug. Based on plasma drug concentrations obtained at different time points, we will  
16 calculate certain pharmacokinetic variables related to study drugs. Drug peak concentrations  
17 (Cmax) and exposure (AUC) will be linked to time to sputum conversion and occurrence of  
18 adverse events  
19  
20  
21  
22  
23  
24  
25  
26  
27  
28  
29  
30  
31  
32

33 Data Safety Monitoring Board (DSMB): The DSMB for this study comprises of TB  
34 clinicians, pharmacokinetic specialists, and an independent biostatistician. They will review data  
35 from this trial on a regular basis, including incidence progress of the trial, and detect evidence of  
36 early safety issues for the trial participants with a specific focus on grade 3 or 4 AEs, SAEs, and  
37 treatment discontinuations due to AE. Based on the results, DSMB shall make recommendations  
38 on continuing or terminating / modifications to the trial.  
39  
40  
41  
42  
43  
44  
45  
46

47 Clinical Site Monitoring & Quality assurance: An independent study Monitor, appointed  
48 by the sponsor, will be responsible for monitoring data quality by trial Standard Operating  
49 Procedures. Based on the monitoring plan, field visit and audit will be performed at different  
50 stages. All participant records, CRFs, and other source documents for the patients recruited in  
51  
52  
53  
54  
55  
56  
57  
58  
59  
60

1  
2  
3 this study will be made available for review by the monitors. A meeting of the investigators of  
4 each local site will convene monthly via web-based remote conference system to share the  
5 progress of the study and discuss with the problems met during the trial conduct. During the  
6  
7  
8  
9  
10  
11  
12  
13  
14  
15  
16  
17  
18  
19  
20  
21  
22  
23  
24  
25  
26  
27  
28  
29  
30  
31  
32  
33  
34  
35  
36  
37  
38  
39  
40  
41  
42  
43  
44  
45  
46  
47  
48  
49  
50  
51  
52  
53  
54  
55  
56  
57  
58  
59  
60

conduct of the research, any critical protocol modifications will be informed to the IEC, trial registry and if relevant to the trial participants.

Confidentially of trial data: The processing of personal data in this trial will be limited to those data that are reasonably necessary to investigate the antibacterial activity, safety, and tolerability of the investigational product used in this trial. These data will be processed with adequate precautions to ensure confidentiality. Trained professional will collect all study data with the utmost sensitivity and confidentiality. The study participant will be informed during the informed consent process that - the monitor(s), the IEC, and the regulatory authority(is) will be granted direct access to the participant's original medical records for verification of clinical trial procedures and/or data, without violating the confidentiality of the participant, to the extent permitted by the applicable laws. Otherwise, only the study investigator and his/her team will have access to the trial data.

### **Ethics and Dissemination**

This trial will proceed as per the current ICH Good Clinical Practice and the ICMR Ethical guidelines for biomedical research in human participants. Compliance with this standard provides public assurance that the rights, safety, and well-being of trial subjects are protected; consistent with the principles that have their origin in the Declaration of Helsinki, and that the clinical trial data are credible. The confidentiality of the study participants will be protected throughout the study period as per provision in the Indian-GCP & applicable regulations by laws



1  
2  
3 of India. The processing of personal data in this trial will be limited to those data that are  
4 reasonably necessary to investigate the antibacterial activity, safety, and tolerability of the  
5 investigational product used in this trial.  
6  
7

8  
9  
10 The study principal investigator holds primary responsibility for the preparation of manuscripts  
11 and materials for result dissemination and publication. Once the trial is complete, the  
12 investigators anticipate publishing results of this study in several peer-reviewed scientific  
13 journals, present the abstracts in meetings, to stakeholders and policymakers and share the results  
14 widely with the Programme managers. During all these processes, details of the trial participant  
15 will remain confidential.  
16  
17  
18  
19  
20  
21  
22  
23  
24  
25

## 26 **Discussions:**

27  
28 Currently, for the management of new sputum smear-positive drug-sensitive pulmonary  
29 TB patients, 6-month regimens are used in more than 90 countries that are evaluated to be  
30 effective [12]. Newer anti-TB drugs are also in the pipeline. However, all types of treatment  
31 currently available are pathogen-targeted and with toxic drugs. Drug-toxicity can lead to poor  
32 treatment adherence resulting in treatment failure and development of resistance. As the  
33 pathogen-targeted strategies may lead to the development of acquired microbial resistance, new  
34 “host-targeted” adjunct therapeutic approaches not only are less likely to engender microbial  
35 resistance but also augment protective host immune responses thus accelerating bacterial  
36 clearance from the system.  
37  
38  
39  
40  
41  
42  
43  
44  
45  
46  
47  
48

49 Metformin has an inhibitory effect on mitochondrial complex I, inhibition of which has  
50 been found to increase the AMP/ATP ratio [13, 14]. The altered cellular energy status induces  
51 activation of AMPK, a serine/threonine kinase, and acts as an energy sensor [15]. Activation of  
52  
53  
54  
55  
56  
57  
58  
59  
60

1  
2  
3 AMPK by metformin stimulates endothelial nitric oxide synthase (eNOS) activity which leads to  
4 bacterial killing [16]. Metformin also acts through AMPK-independent mechanisms. It promotes  
5 phagocytosis, phagolysosome fusion & autophagy in macrophages. Macrophages exposed to  
6 metformin had higher bactericidal capacity attributed to increased mitochondrial Reactive  
7 Oxidative Species (ROS) production required for bacterial killing [17]. Since 90% of the newly  
8 diagnosed sputum positive patients are sensitive to isoniazid (H) and rifampicin (R), it is  
9 assumed that adding the drug metformin would have a beneficial effect in the early killing of  
10 intracellular bacteria by influencing the host immunity. Experiments in mice with MET (500  
11 mg/kg) alone have shown reduced bacillary load in both lung and spleen which is equivalent to a  
12 MET dose of 2430 mg/day for a 60-kg human [18]. High dose of metformin has also been used  
13 in clinical practice for the management of diabetic individuals with and without TB and in non-  
14 diabetic conditions like polycystic ovarian syndrome and obesity [19, 20].

15  
16  
17 We are proposing a Phase IIB trial looking at sputum-culture conversion to negative over  
18 a 2-month period as studies have shown a correlation between positive 2-month sputum-culture  
19 status and subsequent relapse. However, limitations of this design include the binary outcome of  
20 2-month sputum-culture endpoint, hence requiring larger samples size to prove the benefit. To  
21 overcome this limitation, we plan serial sputum colony counting (SSCC) and time-to-detection  
22 (TTD). SSCC employs quantitative sputum cultures measured at several time points over a 2-  
23 month period. These measurements allow for the calculation of time to stable culture conversion  
24 as well as a change in CFU/ml/day, a continuous longitudinal variable with greater power  
25 compared with the binary culture conversion [21]. TTD in liquid culture may offer a potential  
26 alternative to SSCC and the problems of quantitative cultures, by replacing CFU counting with  
27 the automated measurement of TTD during the 8-week period. In our study, as the outcome

1  
2  
3 measures of interest (primarily bacteriological) are based on objective microbiology, the  
4 bacteriology laboratory staff will be blinded to the patient's treatment. Safety assessments will be  
5 defined as objectively as possible, using pre-defined grading criteria for laboratory abnormalities  
6 and adverse events. The pharmacokinetic aspect of the study is based on a population approach  
7 which is facilitated by the intensive-sparse sampling design. The study will estimate the  
8 pharmacokinetic exposure (AUC<sub>0–24</sub>) for all study participants. Several alternative biomarkers  
9 of treatment response are also being evaluated using these samples.  
10  
11  
12  
13  
14  
15  
16  
17  
18  
19

20 Results from METRIF study will complement observations from other retrospective and  
21 case-control studies that showed metformin to be a protective agent against TB infection among  
22 people with diabetes [22, 23]. As studies did not show any dose-dependent protection in  
23 metformin users for TB, we will be using 500mg dose for the first week followed by 1000mg for  
24 the remaining 7-weeks. This dose escalation is being done to reduce the gastrointestinal side  
25 effects of metformin. If the study regimen is successful, it will pave the way to evaluate shorter  
26 regimens for the treatment of PTB. This is expected to provide a new standard of care for DS-  
27 PTB which would cut down the number of required clinic visits and the burden on the health  
28 care system and could also decrease the percentage of patients who fail to complete the full  
29 course of current longer therapy. If the study regimens are shown to be non-inferior or superior  
30 to the control regimen, that would represent an even greater advantage for patients with DS-PTB  
31 and TB control programmes globally.  
32  
33  
34  
35  
36  
37  
38  
39  
40  
41  
42  
43  
44  
45  
46  
47  
48  
49  
50  
51  
52  
53

## 54 REFERENCES

55  
56 1. Global Tuberculosis Report 2017. World Health Organization. Geneva. Accessed from  
57

1  
2  
3 [http://www.who.int/tb/publications/global\\_report/en/](http://www.who.int/tb/publications/global_report/en/)

4  
5 2. Kuijl C, Savage ND, Marsman N, et al. Intracellular bacterial growth is controlled by a kinase  
6 network around PKB/AKT1. *Nature* 2007; 450 (7170): 725-30.

7  
8 3. Ejim L, Farha MA, Falconer SB, et al. Combinations of antibiotics and nonantibiotic drugs  
9 enhance antimicrobial efficacy. *Nat. Chem. Biol.* 2011; 7, 348–350.

10  
11 4. Bhatt K, Salgame P. Host innate immune response to *Mycobacterium tuberculosis*. *J. Clin.*  
12 *Immunol.* 2007; 27, 347–362.

13  
14 5. Behar SM, Divangahi M, Remold H. Evasion of innate immunity by *Mycobacterium*  
15 *tuberculosis*: Is death an exit strategy? *Nat. Rev. Microbiol.* 2010; 8, 668–674

16  
17 6. Gutierrez MG, Master SS, Singh SB et al. Autophagy is a defense mechanism inhibiting BCG  
18 and *Mycobacterium tuberculosis* survival in infected macrophages. *Cell* 2004; 119, 753–766.

19  
20 7. Kim J, Kundu M, Violet B, et al. AMPK, and mTOR regulate autophagy through direct  
21 phosphorylation of Ulk1. *Nat. Cell Biol.* 2011; 13, 132–141.

22  
23 8. Kumar D, Nath L, Kamal MA et al. Genome-wide analysis of the host intracellular network  
24 that regulates survival of *Mycobacterium tuberculosis*. *Cell* 2010; 140, 731–743.

25  
26 9. Singhal A, Jie L, Kumar P et al. Metformin as adjunct antituberculosis therapy. *Science*  
27 *Translational Medicine* 2014; 6: 263

28  
29 10. Division of AIDS (DAIDS) Table for Grading the Severity of Adult and Pediatric Adverse  
30 Events. Version 2.1, March 2017. Accessed on 29<sup>th</sup> March 2018. Available from [https://rsc.tech-](https://rsc.tech-res.com/docs/default-source/safety/daids-ae-grading-table-mar2017.pdf)  
31 [res.com/docs/default-source/safety/daids-ae-grading-table-mar2017.pdf](https://rsc.tech-res.com/docs/default-source/safety/daids-ae-grading-table-mar2017.pdf)

32  
33 11. Wang JY, Wang JT, Tsai TH et al. Adding moxifloxacin is associated with a shorter time to  
34 culture conversion in pulmonary tuberculosis. *Int J Tuberc Lung Dis* 2010; 14(1): 65-71.

35  
36 12. Fox W, Ellard GA, Mitchinson DA. Studies on the treatment of tuberculosis undertaken by  
37 the British Medical Research Council tuberculosis units, 1946–1986, with relevant subsequent  
38 publications. *Int J Tuberc Lung Dis.* 1999; 3(10): S231–79.

39  
40 13. El-Mir MY, Nogueira V, Fontaine E, et al. Dimethylbiguanide inhibits cell respiration via an  
41 indirect effect targeted on the respiratory chain complex I. *J Biol Chem.* 2000; 275:223–8.

42  
43 14. Owen MR, Doran E, Halestrap AP. Evidence that metformin exerts its anti-diabetic effects  
44 through inhibition of complex 1 of the mitochondrial respiratory chain. *Biochem J.* 2000; 348:  
45 607–14.

- 1  
2  
3 15. Hardie DG. The AMP-activated protein kinase pathway: new players upstream and  
4 downstream. *J Cell Sci.*2004; 117: 5479–87.  
5  
6 16. Davis BJ, Xie Z, Viollet B, et al. Activation of the AMP-activated kinase by anti-diabetes  
7 drug metformin stimulates nitric oxide synthesis in vivo by promoting the association of heat  
8 shock protein 90 and endothelial nitric oxide synthase. *Diabetes* 2006; 55: 496– 505.  
9  
10 17. Hor-Yue Tan, Ning Wang, Sha Li, Ming Hong, Xuanbin Wang, Yibin Feng. The Reactive  
11 Oxygen Species in Macrophage Polarization: Reflecting Its Dual Role in Progression and  
12 Treatment of Human Diseases. *Oxid Med Cell Longev.* 2016; 2016: 2795090.  
13  
14 18. Reigner BG, Blesch KS. Estimating the starting dose for entry into humans: Principles and  
15 practice. *Eur J Clin Pharmacol* 2002; 57: 835-845  
16  
17 19. Lord JM, Flight IHK, Norman RJ. Metformin in polycystic ovary syndrome: Systematic  
18 review and meta-analysis. *Br Med J* 2003; 327: 951  
19  
20 20. Levri KM, Slaymaker E, Last A et al. Metformin as a treatment for overweight and obese  
21 adults. *Ann Fam Med* 2005; 3 (5): 457-461  
22  
23 21. Bark CM, Furin JJ, Johnson JL. Approaches to clinical trials of new anti-TB drugs. *Clin.*  
24 *Invest* 2012; 2(4): 359–370  
25  
26 22. Sullivan T, Amor BY. The co-management of tuberculosis and diabetes: Challenges and  
27 opportunities in the developing world. *PLOS Med.* 2012; 9, e1001269.  
28  
29 23. Marupuru S, Senapati P, Pathadka S et al. Protective effect of metformin against tuberculosis  
30 infections in diabetic patients: an observational study of south Indian tertiary healthcare facility.  
31 *Braz J Infect Dis* 2017; 21(3): 312-316  
32  
33  
34  
35  
36  
37  
38  
39  
40  
41  
42  
43  
44  
45  
46  
47  
48  
49  
50

- 51 • **Authors' contributions:** CPP, SS, RG & TB – conceived & designed the study / CPP,  
52 PKB, MN, CPR, HK, NSG, MSJ, MS, & SS – development and writing of the study  
53 protocol and this manuscript  
54  
55  
56  
57

- 1  
2  
3  
4  
5  
6  
7  
8  
9  
10  
11  
12  
13  
14  
15  
16  
17  
18  
19  
20  
21  
22  
23  
24  
25  
26  
27  
28  
29  
30  
31  
32  
33  
34  
35  
36  
37  
38  
39  
40  
41  
42  
43  
44  
45  
46  
47  
48  
49  
50  
51  
52  
53  
54  
55  
56  
57  
58  
59  
60
- **Funding:** India TB Research Consortium, Indian Council of Medical Research, New Delhi and Open Source Pharma Foundation, Bangalore, India provided funding for the study. Trial Sponsor: Indian Council of Medical Research – National Institute for Research in Tuberculosis
  - **Competing interests:** None

For peer review only

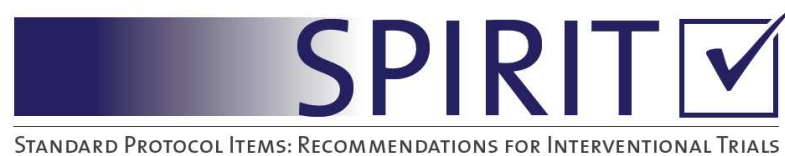

SPIRIT 2013 Checklist: Recommended items to address in a clinical trial protocol and related documents\*

| Section/item                      | Item No | Description                                                                                                                                                                                                                                                                              | Addressed on page number |
|-----------------------------------|---------|------------------------------------------------------------------------------------------------------------------------------------------------------------------------------------------------------------------------------------------------------------------------------------------|--------------------------|
| <b>Administrative information</b> |         |                                                                                                                                                                                                                                                                                          |                          |
| Title                             | 1       | Descriptive title identifying the study design, population, interventions, and, if applicable, trial acronym                                                                                                                                                                             | ___ 1 ___                |
| Trial registration                | 2a      | Trial identifier and registry name. If not yet registered, name of intended registry                                                                                                                                                                                                     | ___ 3 ___                |
|                                   | 2b      | All items from the World Health Organization Trial Registration Data Set                                                                                                                                                                                                                 | ___ n/a ___              |
| Protocol version                  | 3       | Date and version identifier                                                                                                                                                                                                                                                              | ___ 15 ___               |
| Funding                           | 4       | Sources and types of financial, material, and other support                                                                                                                                                                                                                              | ___ 15 ___               |
| Roles and responsibilities        | 5a      | Names, affiliations, and roles of protocol contributors                                                                                                                                                                                                                                  | ___ 16 ___               |
|                                   | 5b      | Name and contact information for the trial sponsor                                                                                                                                                                                                                                       | ___ 16 ___               |
|                                   | 5c      | Role of study sponsor and funders, if any, in study design; collection, management, analysis, and interpretation of data; writing of the report; and the decision to submit the report for publication, including whether they will have ultimate authority over any of these activities | ___ 16 ___               |
|                                   | 5d      | Composition, roles, and responsibilities of the coordinating centre, steering committee, endpoint adjudication committee, data management team, and other individuals or groups overseeing the trial, if applicable (see Item 21a for data monitoring committee)                         | ___ 12 ___               |

1  
2  
3  
4  
5  
6  
7  
8  
9  
10  
11  
12  
13  
14  
15  
16  
17  
18  
19  
20  
21  
22  
23  
24  
25  
26  
27  
28  
29  
30  
31  
32  
33  
34  
35  
36  
37  
38  
39  
40  
41  
42  
43  
44  
45  
46  
47

## Introduction

|                          |    |                                                                                                                                                                                                           |   |
|--------------------------|----|-----------------------------------------------------------------------------------------------------------------------------------------------------------------------------------------------------------|---|
| Background and rationale | 6a | Description of research question and justification for undertaking the trial, including summary of relevant studies (published and unpublished) examining benefits and harms for each intervention        | 4 |
|                          | 6b | Explanation for choice of comparators                                                                                                                                                                     | 5 |
| Objectives               | 7  | Specific objectives or hypotheses                                                                                                                                                                         | 5 |
| Trial design             | 8  | Description of trial design including type of trial (eg, parallel group, crossover, factorial, single group), allocation ratio, and framework (eg, superiority, equivalence, noninferiority, exploratory) | 5 |

## Methods: Participants, interventions, and outcomes

|                      |     |                                                                                                                                                                                                                                                                                                                                                                                |         |
|----------------------|-----|--------------------------------------------------------------------------------------------------------------------------------------------------------------------------------------------------------------------------------------------------------------------------------------------------------------------------------------------------------------------------------|---------|
| Study setting        | 9   | Description of study settings (eg, community clinic, academic hospital) and list of countries where data will be collected. Reference to where list of study sites can be obtained                                                                                                                                                                                             | 6       |
| Eligibility criteria | 10  | Inclusion and exclusion criteria for participants. If applicable, eligibility criteria for study centres and individuals who will perform the interventions (eg, surgeons, psychotherapists)                                                                                                                                                                                   | 6       |
| Interventions        | 11a | Interventions for each group with sufficient detail to allow replication, including how and when they will be administered                                                                                                                                                                                                                                                     | 6 & 7   |
|                      | 11b | Criteria for discontinuing or modifying allocated interventions for a given trial participant (eg, drug dose change in response to harms, participant request, or improving/worsening disease)                                                                                                                                                                                 | 10      |
|                      | 11c | Strategies to improve adherence to intervention protocols, and any procedures for monitoring adherence (eg, drug tablet return, laboratory tests)                                                                                                                                                                                                                              | 10      |
|                      | 11d | Relevant concomitant care and interventions that are permitted or prohibited during the trial                                                                                                                                                                                                                                                                                  | 10      |
| Outcomes             | 12  | Primary, secondary, and other outcomes, including the specific measurement variable (eg, systolic blood pressure), analysis metric (eg, change from baseline, final value, time to event), method of aggregation (eg, median, proportion), and time point for each outcome. Explanation of the clinical relevance of chosen efficacy and harm outcomes is strongly recommended | 11      |
| Participant timeline | 13  | Time schedule of enrolment, interventions (including any run-ins and washouts), assessments, and visits for participants. A schematic diagram is highly recommended (see Figure)                                                                                                                                                                                               | 12 & 20 |



1  
2  
3 Sample size 14 Estimated number of participants needed to achieve study objectives and how it was determined, including \_\_\_\_\_12\_\_\_\_\_

4 clinical and statistical assumptions supporting any sample size calculations

5  
6 Recruitment 15 Strategies for achieving adequate participant enrolment to reach target sample size \_\_\_\_\_9\_\_\_\_\_

7  
8 **Methods: Assignment of interventions (for controlled trials)**

9  
10 Allocation:

11 Sequence generation 16a Method of generating the allocation sequence (eg, computer-generated random numbers), and list of any \_\_\_\_\_12\_\_\_\_\_

12 factors for stratification. To reduce predictability of a random sequence, details of any planned restriction  
13 (eg, blocking) should be provided in a separate document that is unavailable to those who enrol participants  
14 or assign interventions

15  
16 Allocation concealment mechanism 16b Mechanism of implementing the allocation sequence (eg, central telephone; sequentially numbered, \_\_\_\_\_12\_\_\_\_\_

17 opaque, sealed envelopes), describing any steps to conceal the sequence until interventions are assigned

18  
19 Implementation 16c Who will generate the allocation sequence, who will enrol participants, and who will assign participants to \_\_\_\_\_12\_\_\_\_\_

20 interventions

21 Blinding (masking) 17a Who will be blinded after assignment to interventions (eg, trial participants, care providers, outcome \_\_\_\_\_n/a\_\_\_\_\_

22 assessors, data analysts), and how

23  
24 17b If blinded, circumstances under which unblinding is permissible, and procedure for revealing a participant's \_\_\_\_\_n/a\_\_\_\_\_

25 allocated intervention during the trial

26  
27  
28  
29  
30  
31 **Methods: Data collection, management, and analysis**

32  
33 Data collection methods 18a Plans for assessment and collection of outcome, baseline, and other trial data, including any related \_\_\_\_\_13\_\_\_\_\_

34 processes to promote data quality (eg, duplicate measurements, training of assessors) and a description of  
35 study instruments (eg, questionnaires, laboratory tests) along with their reliability and validity, if known.  
36 Reference to where data collection forms can be found, if not in the protocol

37  
38 18b Plans to promote participant retention and complete follow-up, including list of any outcome data to be \_\_\_\_\_n/a\_\_\_\_\_

39 collected for participants who discontinue or deviate from intervention protocols

|    |                                 |     |                                                                                                                                                                                                                                                                                                                                       |                 |
|----|---------------------------------|-----|---------------------------------------------------------------------------------------------------------------------------------------------------------------------------------------------------------------------------------------------------------------------------------------------------------------------------------------|-----------------|
| 1  |                                 |     |                                                                                                                                                                                                                                                                                                                                       |                 |
| 2  |                                 |     |                                                                                                                                                                                                                                                                                                                                       |                 |
| 3  | Data management                 | 19  | Plans for data entry, coding, security, and storage, including any related processes to promote data quality (eg, double data entry; range checks for data values). Reference to where details of data management procedures can be found, if not in the protocol                                                                     | ___13_____      |
| 4  |                                 |     |                                                                                                                                                                                                                                                                                                                                       |                 |
| 5  |                                 |     |                                                                                                                                                                                                                                                                                                                                       |                 |
| 6  |                                 |     |                                                                                                                                                                                                                                                                                                                                       |                 |
| 7  | Statistical methods             | 20a | Statistical methods for analysing primary and secondary outcomes. Reference to where other details of the statistical analysis plan can be found, if not in the protocol                                                                                                                                                              | ___13_____      |
| 8  |                                 |     |                                                                                                                                                                                                                                                                                                                                       |                 |
| 9  |                                 |     |                                                                                                                                                                                                                                                                                                                                       |                 |
| 10 |                                 | 20b | Methods for any additional analyses (eg, subgroup and adjusted analyses)                                                                                                                                                                                                                                                              | ___13_____      |
| 11 |                                 |     |                                                                                                                                                                                                                                                                                                                                       |                 |
| 12 |                                 | 20c | Definition of analysis population relating to protocol non-adherence (eg, as randomised analysis), and any statistical methods to handle missing data (eg, multiple imputation)                                                                                                                                                       | ___n/a_____     |
| 13 |                                 |     |                                                                                                                                                                                                                                                                                                                                       |                 |
| 14 |                                 |     |                                                                                                                                                                                                                                                                                                                                       |                 |
| 15 | <b>Methods: Monitoring</b>      |     |                                                                                                                                                                                                                                                                                                                                       |                 |
| 16 |                                 |     |                                                                                                                                                                                                                                                                                                                                       |                 |
| 17 | Data monitoring                 | 21a | Composition of data monitoring committee (DMC); summary of its role and reporting structure; statement of whether it is independent from the sponsor and competing interests; and reference to where further details about its charter can be found, if not in the protocol. Alternatively, an explanation of why a DMC is not needed | ___13_____      |
| 18 |                                 |     |                                                                                                                                                                                                                                                                                                                                       |                 |
| 19 |                                 |     |                                                                                                                                                                                                                                                                                                                                       |                 |
| 20 |                                 |     |                                                                                                                                                                                                                                                                                                                                       |                 |
| 21 |                                 |     |                                                                                                                                                                                                                                                                                                                                       |                 |
| 22 |                                 | 21b | Description of any interim analyses and stopping guidelines, including who will have access to these interim results and make the final decision to terminate the trial                                                                                                                                                               | ___12_____      |
| 23 |                                 |     |                                                                                                                                                                                                                                                                                                                                       |                 |
| 24 |                                 |     |                                                                                                                                                                                                                                                                                                                                       |                 |
| 25 | Harms                           | 22  | Plans for collecting, assessing, reporting, and managing solicited and spontaneously reported adverse events and other unintended effects of trial interventions or trial conduct                                                                                                                                                     | ___13 & 14_____ |
| 26 |                                 |     |                                                                                                                                                                                                                                                                                                                                       |                 |
| 27 |                                 |     |                                                                                                                                                                                                                                                                                                                                       |                 |
| 28 | Auditing                        | 23  | Frequency and procedures for auditing trial conduct, if any, and whether the process will be independent from investigators and the sponsor                                                                                                                                                                                           | ___n/a_____     |
| 29 |                                 |     |                                                                                                                                                                                                                                                                                                                                       |                 |
| 30 |                                 |     |                                                                                                                                                                                                                                                                                                                                       |                 |
| 31 |                                 |     |                                                                                                                                                                                                                                                                                                                                       |                 |
| 32 | <b>Ethics and dissemination</b> |     |                                                                                                                                                                                                                                                                                                                                       |                 |
| 33 |                                 |     |                                                                                                                                                                                                                                                                                                                                       |                 |
| 34 | Research ethics approval        | 24  | Plans for seeking research ethics committee/institutional review board (REC/IRB) approval                                                                                                                                                                                                                                             | ___6_____       |
| 35 |                                 |     |                                                                                                                                                                                                                                                                                                                                       |                 |
| 36 |                                 |     |                                                                                                                                                                                                                                                                                                                                       |                 |
| 37 | Protocol amendments             | 25  | Plans for communicating important protocol modifications (eg, changes to eligibility criteria, outcomes, analyses) to relevant parties (eg, investigators, REC/IRBs, trial participants, trial registries, journals, regulators)                                                                                                      | ___14_____      |
| 38 |                                 |     |                                                                                                                                                                                                                                                                                                                                       |                 |
| 39 |                                 |     |                                                                                                                                                                                                                                                                                                                                       |                 |
| 40 |                                 |     |                                                                                                                                                                                                                                                                                                                                       |                 |
| 41 |                                 |     |                                                                                                                                                                                                                                                                                                                                       |                 |
| 42 |                                 |     |                                                                                                                                                                                                                                                                                                                                       |                 |
| 43 |                                 |     |                                                                                                                                                                                                                                                                                                                                       |                 |
| 44 |                                 |     |                                                                                                                                                                                                                                                                                                                                       |                 |
| 45 |                                 |     |                                                                                                                                                                                                                                                                                                                                       |                 |
| 46 |                                 |     |                                                                                                                                                                                                                                                                                                                                       |                 |
| 47 |                                 |     |                                                                                                                                                                                                                                                                                                                                       |                 |

|    |                               |     |                                                                                                                                                                                                                                                                                     |               |
|----|-------------------------------|-----|-------------------------------------------------------------------------------------------------------------------------------------------------------------------------------------------------------------------------------------------------------------------------------------|---------------|
| 1  |                               |     |                                                                                                                                                                                                                                                                                     |               |
| 2  |                               |     |                                                                                                                                                                                                                                                                                     |               |
| 3  | Consent or assent             | 26a | Who will obtain informed consent or assent from potential trial participants or authorised surrogates, and how (see Item 32)                                                                                                                                                        | _____7_____   |
| 4  |                               |     |                                                                                                                                                                                                                                                                                     |               |
| 5  |                               |     |                                                                                                                                                                                                                                                                                     |               |
| 6  |                               | 26b | Additional consent provisions for collection and use of participant data and biological specimens in ancillary studies, if applicable                                                                                                                                               | _____7_____   |
| 7  |                               |     |                                                                                                                                                                                                                                                                                     |               |
| 8  | Confidentiality               | 27  | How personal information about potential and enrolled participants will be collected, shared, and maintained in order to protect confidentiality before, during, and after the trial                                                                                                | _____15_____  |
| 9  |                               |     |                                                                                                                                                                                                                                                                                     |               |
| 10 |                               |     |                                                                                                                                                                                                                                                                                     |               |
| 11 | Declaration of interests      | 28  | Financial and other competing interests for principal investigators for the overall trial and each study site                                                                                                                                                                       | _____18_____  |
| 12 |                               |     |                                                                                                                                                                                                                                                                                     |               |
| 13 |                               |     |                                                                                                                                                                                                                                                                                     |               |
| 14 | Access to data                | 29  | Statement of who will have access to the final trial dataset, and disclosure of contractual agreements that limit such access for investigators                                                                                                                                     | _____15_____  |
| 15 |                               |     |                                                                                                                                                                                                                                                                                     |               |
| 16 |                               |     |                                                                                                                                                                                                                                                                                     |               |
| 17 | Ancillary and post-trial care | 30  | Provisions, if any, for ancillary and post-trial care, and for compensation to those who suffer harm from trial participation                                                                                                                                                       | _____n/a_____ |
| 18 |                               |     |                                                                                                                                                                                                                                                                                     |               |
| 19 |                               |     |                                                                                                                                                                                                                                                                                     |               |
| 20 | Dissemination policy          | 31a | Plans for investigators and sponsor to communicate trial results to participants, healthcare professionals, the public, and other relevant groups (eg, via publication, reporting in results databases, or other data sharing arrangements), including any publication restrictions | _____15_____  |
| 21 |                               |     |                                                                                                                                                                                                                                                                                     |               |
| 22 |                               |     |                                                                                                                                                                                                                                                                                     |               |
| 23 |                               |     |                                                                                                                                                                                                                                                                                     |               |
| 24 |                               |     |                                                                                                                                                                                                                                                                                     |               |
| 25 |                               | 31b | Authorship eligibility guidelines and any intended use of professional writers                                                                                                                                                                                                      | _____n/a_____ |
| 26 |                               |     |                                                                                                                                                                                                                                                                                     |               |
| 27 |                               | 31c | Plans, if any, for granting public access to the full protocol, participant-level dataset, and statistical code                                                                                                                                                                     | _____n/a_____ |
| 28 |                               |     |                                                                                                                                                                                                                                                                                     |               |
| 29 | <b>Appendices</b>             |     |                                                                                                                                                                                                                                                                                     |               |
| 30 |                               |     |                                                                                                                                                                                                                                                                                     |               |
| 31 | Informed consent materials    | 32  | Model consent form and other related documentation given to participants and authorised surrogates                                                                                                                                                                                  | _____Yes_____ |
| 32 |                               |     |                                                                                                                                                                                                                                                                                     | _____         |
| 33 |                               |     |                                                                                                                                                                                                                                                                                     |               |
| 34 | Biological specimens          | 33  | Plans for collection, laboratory evaluation, and storage of biological specimens for genetic or molecular analysis in the current trial and for future use in ancillary studies, if applicable                                                                                      | _____Yes_____ |
| 35 |                               |     |                                                                                                                                                                                                                                                                                     | _____         |
| 36 |                               |     |                                                                                                                                                                                                                                                                                     |               |

37 \*It is strongly recommended that this checklist be read in conjunction with the SPIRIT 2013 Explanation & Elaboration for important clarification on the items.  
 38 Amendments to the protocol should be tracked and dated. The SPIRIT checklist is copyrighted by the SPIRIT Group under the Creative Commons  
 39 "[Attribution-NonCommercial-NoDerivs 3.0 Unported](https://creativecommons.org/licenses/by-nc-nd/3.0/)" license.  
 40

# BMJ Open

## Evaluation of Metformin in combination with Rifampicin containing Anti-tuberculosis therapy in patients with new, smear-positive pulmonary tuberculosis (METRIF): Study protocol for a randomized clinical trial

|                                 |                                                                                                                                                                                                                                                                                                                                                                                                                                                                                                                                                                                                                                                                                                                |
|---------------------------------|----------------------------------------------------------------------------------------------------------------------------------------------------------------------------------------------------------------------------------------------------------------------------------------------------------------------------------------------------------------------------------------------------------------------------------------------------------------------------------------------------------------------------------------------------------------------------------------------------------------------------------------------------------------------------------------------------------------|
| Journal:                        | <i>BMJ Open</i>                                                                                                                                                                                                                                                                                                                                                                                                                                                                                                                                                                                                                                                                                                |
| Manuscript ID                   | bmjopen-2018-024363.R2                                                                                                                                                                                                                                                                                                                                                                                                                                                                                                                                                                                                                                                                                         |
| Article Type:                   | Protocol                                                                                                                                                                                                                                                                                                                                                                                                                                                                                                                                                                                                                                                                                                       |
| Date Submitted by the Author:   | 21-Nov-2018                                                                                                                                                                                                                                                                                                                                                                                                                                                                                                                                                                                                                                                                                                    |
| Complete List of Authors:       | Padmapriyadarsini, Chandrasekaran; National Institute for Research in Tuberculosis, P.K., Bhavani; National Institute for Research in Tuberculosis Natrajan, Mohan; National Institute for Research in Tuberculosis C, Ponnuraja; National Institute for Research in Tuberculosis Kumar, Hemanth; National Institute for Research in Tuberculosis Gomathy, N.S.; National Institute for Research in Tuberculosis Guleria, Randeep; All India Institute of Medical Sciences M.S., Jawahar; Open Source Pharma Foundation SIngh, Manjula; Indian Council of Medical Research Tanjore, Balganes; Open Source Pharma Foundation Swaminathan, Soumya; World Health Organisation; Indian Council of Medical Research |
| <b>Primary Subject Heading</b>: | Respiratory medicine                                                                                                                                                                                                                                                                                                                                                                                                                                                                                                                                                                                                                                                                                           |
| Secondary Subject Heading:      | Infectious diseases, Respiratory medicine                                                                                                                                                                                                                                                                                                                                                                                                                                                                                                                                                                                                                                                                      |
| Keywords:                       | Protocols & guidelines < HEALTH SERVICES ADMINISTRATION & MANAGEMENT, Tuberculosis < INFECTIOUS DISEASES, Respiratory infections < THORACIC MEDICINE, Clinical trials < THERAPEUTICS, PUBLIC HEALTH                                                                                                                                                                                                                                                                                                                                                                                                                                                                                                            |
|                                 |                                                                                                                                                                                                                                                                                                                                                                                                                                                                                                                                                                                                                                                                                                                |

SCHOLARONE™  
Manuscripts

1  
2  
3 **Evaluation of Metformin in combination with Rifampicin containing Anti-tuberculosis**  
4  
5 **therapy in patients with new, smear-positive pulmonary tuberculosis (METRIF):**  
6  
7  
8 **Study protocol for a randomized clinical trial**  
9  
10

11  
12 C Padmapriyadarsini<sup>1</sup>, PK Bhavani<sup>1</sup>, Mohan Natrajan<sup>1</sup>, C Ponnuraja<sup>1</sup>, Hemanth Kumar<sup>1</sup>,  
13 NS Gomathy<sup>1</sup>, Randeep Guleria<sup>2</sup>, M.S.Jawahar<sup>3</sup>, Manjula Singh<sup>4</sup>,  
14 T. Balganes<sup>3</sup>, Soumya Swaminathan<sup>4,5</sup>  
15  
16

17  
18 <sup>1</sup>ICMR-National Institute for Research in Tuberculosis, Chennai

19 <sup>2</sup>All India Institute for Medical Sciences, New Delhi

20 <sup>3</sup>Open Source Pharma Foundation, Bangalore

21 <sup>4</sup>Indian Council of Medical Research-India TB Research Consortium, New Delhi

22 <sup>5</sup>World Health Organization, Geneva  
23  
24  
25  
26  
27  
28  
29  
30  
31  
32  
33

34 **E-mail address of Authors:**

35 **CPP:** [pcorchids@gmail.com](mailto:pcorchids@gmail.com) / **PKB:** [bhavanipk@yahoo.com](mailto:bhavanipk@yahoo.com) / **MN:** [mohan.n@nirt.res.in](mailto:mohan.n@nirt.res.in) / **CPR:**  
36 [cponnuraja@nirt.res.in](mailto:cponnuraja@nirt.res.in) / **HK:** [akhemanth20@gmail.com](mailto:akhemanth20@gmail.com) / **NSG:** [gomathisharma@nirt.res.in](mailto:gomathisharma@nirt.res.in) / **RG:**  
37 [randeepguleria2002@gmail.com](mailto:randeepguleria2002@gmail.com) / **MM:** [mmamulwar@nariindia.org](mailto:mmamulwar@nariindia.org) / **MSJ:** [shaheedjawahar@gmail.com](mailto:shaheedjawahar@gmail.com) /  
38 **MS:** [drmanjulasb@gmail.com](mailto:drmanjulasb@gmail.com) / **TB:** [tanjores.balganes@gmail.com](mailto:tanjores.balganes@gmail.com) / **SS:** [doctorsoumya@yahoo.com](mailto:doctorsoumya@yahoo.com)  
39  
40  
41  
42  
43  
44

45 **Address for Correspondence:**

46 Dr.Padmapriyadarsini  
47 National Institute for Research in Tuberculosis  
48 No.1, Mayor Sathyamoorthy Road  
49 Chetput, Chennai 600031  
50 Phone: +91 9498022949  
51 Fax No: 04428362525  
52 e-mail: [pcorchids@gmail.com](mailto:pcorchids@gmail.com)  
53  
54

55 **Abstract**  
56  
57  
58  
59  
60

1  
2  
3  
4 **Introduction:** Shorter duration of treatment for the management of drug-susceptible pulmonary  
5 tuberculosis (TB) would be a significant improvement in the care of patients suffering from the  
6 disease. Besides newer drugs and regimens, other modalities like host-directed therapy are also  
7 being suggested to reach this goal. This study's objective is to assess the efficacy and safety of  
8 metformin-containing anti-tuberculosis treatment (ATT) regimen in comparison to the standard  
9 6-month ATT regimen in the treatment of newly diagnosed sputum smear positive drug-sensitive  
10 pulmonary tuberculosis patients.  
11  
12  
13  
14  
15  
16  
17  
18  
19  
20

21 **Methods and Analysis:** We are conducting a multicentric, randomized open-label controlled  
22 clinical trial to achieve the study objective. The intervention group will receive isoniazid (H),  
23 rifampicin (R), ethambutol (E) and pyrazinamide (Z) along with 1000mg of daily metformin  
24 (Met) for the first two months while the control group will receive only HRZE. After 2-months,  
25 both the groups will receive HRE daily for four months. The primary endpoint is time to sputum  
26 culture conversion. Secondary endpoints will include time to detection of *mycobacterium*  
27 *tuberculosis* in sputum, pharmacokinetics, and pharmacogenomics of study drugs, drug-drug  
28 interactions, safety and tolerability of the various combinations and measurement of autophagy  
29 and immune responses in the study participants.  
30  
31  
32  
33  
34  
35  
36  
37  
38  
39  
40  
41  
42

43 **Ethics and Dissemination:** The Ethics committee of the participating institutes have approved  
44 the study. Results from this trial will contribute to evidence towards constructing a shorter,  
45 effective and safe regimen for TB patients. The results will be shared widely with the National  
46 Programme managers, policymakers, and stakeholders through open access publications,  
47 dissemination meetings, conference abstracts and policy briefs. This is expected to provide a new  
48 standard of care for drug-sensitive pulmonary TB patients who will not only reduce the number  
49  
50  
51  
52  
53  
54  
55  
56  
57

1  
2  
3 of clinic visits and lost to follow-up of patients from treatment but also reduce the burden on the  
4  
5 health care system.  
6

7  
8 **Trial Registration:** The protocol has been registered on Clinical Trial Registry of India with  
9  
10 identifier CTRI/2018/01/011176 on January 8<sup>th</sup>, 2018.  
11  
12  
13

14  
15 **Strength and Limitations:**

- 16  
17 • Study design, randomized controlled clinical trial, will add considerable power to the  
18  
19 study results and conclusion by decreasing bias (selection bias & observer bias) and  
20  
21 minimizing confounding of unequal distribution.  
22  
23  
24 • This study design of randomized controlled clinical trial with stratification will also  
25  
26 control of group allocation, enhancing similarity of baseline features including disease  
27  
28 severity in the two study arms. This will help us in subgroup analysis improving  
29  
30 usefulness for clinical practice  
31  
32  
33 • Due to the strict exclusion and inclusion criteria of the clinical trial, the results from the  
34  
35 clinical trial may not be generalizable to all groups of TB patients.  
36  
37  
38 • Due to the multicentric nature of the study, the heterogeneity of data may be present  
39  
40  
41 • Relapse rates may not be known in this trial as the study duration is only for six months  
42  
43 of treatment as per the study objective  
44  
45

46 **Keywords:** Metformin, Pulmonary Tuberculosis, Clinical trial, Short-course therapy, TB  
47  
48 treatment  
49  
50  
51  
52  
53  
54  
55  
56  
57

## Introduction:

Globally in 2016, there were an estimated 10.4 million new cases of tuberculosis (TB) with five countries, India, Indonesia, China, Philippines, and Pakistan accounting for 56% of the total cases [1]. There were an estimated 1.3 million TB deaths in 2016 among HIV-negative people and an additional 374000 deaths among people living with HIV [1]. Though effective regimens are available for the treatment of drug-sensitive TB with more than 95% cure, the long duration of such regimens has posed problems for TB treatment and control. This, along with drug toxicity results in poor adherence to treatment resulting in the emergence of drug resistance.

All these have led to an urgent need for more efficient anti-tb drugs, regimens as well as for newer modalities of treating TB. Drugs targeting the TB bacilli can result in the emergence of drug tolerance and resistance, thereby worsening the overall treatment outcomes. Thus there exists a need to consider alternate modalities such as enhancing the host immune system for a faster and complete elimination of the TB bacilli [2, 3]. An efficient and functional immune system is essential to restrain and curb the growth of TB bacilli in the host. Yet, the TB bacilli can still elude the host immune responses, infect the host cells and either multiply or maintain long-term latency in those cells [4, 5]. “Host-targeted” adjunct therapeutic strategies not only augment protective host immune responses but also reduce the chance of development of microbial resistance.

One among the host cell innate antimicrobial arsenal includes the capacity to destroy intracellular pathogens using the phagosomal machinery or autophagy pathway. Intracellular pathogens are effectively controlled by autophagy that is regulated by adenosine monophosphate-activated protein kinase (AMPK) [6, 7]. The *M.tb* virulence results from perturbations in the autophagy network and AMPK signaling [8]. The antidiabetic drug



1  
2  
3 Metformin (MET; 1, 1-dimethyl biguanide), is an AMPK modulator that inhibits the intracellular  
4 growth of *M.tb*, restricts disease immunopathology, and enhances the efficacy of conventional  
5 anti-TB drug [9]. Given these promising findings, we plan to test whether the existing approved  
6 anti-diabetic drug, Metformin added to the existing anti-TB regimen, with its defined effects on  
7 host cell functions could be repurposed for effective and faster treatment of TB as compared to  
8 the current standard of care anti-TB regimens.  
9  
10  
11  
12  
13  
14  
15

16  
17 The Primary objective of this study– the METRIF study- is to study the antibacterial  
18 activity, in terms of time to sputum culture conversion of metformin-containing anti-tuberculosis  
19 treatment (ATT) regimen instituted during the initial 8-weeks of treatment in patients with newly  
20 diagnosed sputum smear-positive pulmonary TB. Secondary objectives of the study are:  
21  
22  
23  
24

- 25  
26  
27  
28  
29  
30  
31  
32  
33  
34  
35  
36  
37  
38  
39  
40  
41  
42  
43  
44  
45  
46  
47  
48  
49  
50  
51  
52  
53  
54  
55  
56  
57  
58  
59  
60
- i. to compare the time to detection (TTD) of *M.tb* in culture in the group receiving metformin-containing regimen with the control group receiving ATT alone.
  - ii. To study the autophagy enhancing effect and host immune responses in the two groups,
  - iii. To examine the post-dosing serum concentration of anti-TB drugs and metformin, their interactions and the impact of genomics - on these parameters (pharmacokinetics (PK) and pharmacogenomics) and
  - iv. To evaluate the safety and tolerability of metformin by measuring the incidence of Treatment-Emergent Adverse Events.

## Methods and Analysis

*Study Design and oversight:* METRIF is a multi-site, randomized, open-labeled, parallel arm, controlled clinical trial comparing the time to sputum culture conversion among patients with pulmonary TB receiving ATT with metformin (experimental arm) compared to those receiving ATT alone (control arm). The study is randomizing 316 participants to one of the two treatment arms in a 1:1 allocation. The study is sponsored by the India TB Research Consortium of the Indian Council of Medical Research and Open Source Pharma Foundation and implemented by the National Institute of Research in Tuberculosis (NIRT), together with other specialized institutes. The Institutional ethics committee of NIRT has approved the study (NIRT-IEC ID: 2017030, dated 14<sup>th</sup> December 2017) and National AIDS Research Institute (NARI) (NARI EC / 2018-10 dated 16th February 2018) and will begin enrollment tentatively by 15th June 2018.

*Study setting:* We will implement METRIF study at three sites in India - NIRT, Chennai and its satellite centers in Madurai and Vellore; All India Institute of Medical Sciences, New Delhi, and, NARI, Pune. These sites will recruit study participants from academic institutions/hospitals as well as community clinics.

*Study patients and eligibility:* Adult patients, previously untreated and newly diagnosed as pulmonary TB with at least two sputum smear sample, collected on two different occasions, positive for acid-fast bacilli and susceptible to rifampicin detected by cartridge-based nucleic acid amplification test will be eligible for the study. Table 1 provides the detailed inclusion and exclusion criteria. Patients who meet these criteria at presentation and attending the identified study sites will be approached to participate in the study.

**Table 1: Eligibility Criteria**

| Inclusion Criteria                                                                                      | Exclusion Criteria                                                                                                                                                                     |
|---------------------------------------------------------------------------------------------------------|----------------------------------------------------------------------------------------------------------------------------------------------------------------------------------------|
| age 18 years and above                                                                                  | Is pregnant or breastfeeding                                                                                                                                                           |
| Is willing to undergo HIV testing                                                                       | Has extra-pulmonary TB or drug-resistant TB                                                                                                                                            |
| Has body weight between 30kg - 65kg                                                                     | Has body weight < 30 kgs or > 65 kgs                                                                                                                                                   |
| Patient has never received treatment with multidrug anti-TB therapy for more than a week.               | Has a prior history of exposure to anti-TB treatment for more than a week                                                                                                              |
| Is willing to use an effective contraceptive method during the study period                             | Has a history of liver disease or current amino alanine transferase greater than three times the upper limit of normal or total bilirubin concentration greater than 2.5 times the ULN |
| Is willing to attend a treatment center for supervised treatment and remain within the study area limit | Is serology positive for hepatitis B virus surface antigen or hepatitis C virus antibody                                                                                               |
| Is willing to sign the informed consent form and adhere to trial procedures and follow-up               | Has concomitant psychiatric illness or seizures                                                                                                                                        |
| Consents for Home visits by the study team                                                              | Has concomitant diabetes mellitus or random blood sugar > 200mg or fasting blood sugar >140 mg/dl                                                                                      |
|                                                                                                         | Has serum creatinine >1.2 mg/dl or blood urea >43 mg/dl                                                                                                                                |

*Study regimen and Drug dosing:* We will randomly assign eligible patients who have provided written informed consent to one of the study regimens in a ratio of 1:1. The site Principal Investigator or his/her nominee who is capable of answering all the trial-related questions from the participants will obtain the study consent. Study participation will last six months: during the first two months, participants will receive the randomly assigned regimen of either daily ATT with metformin or only ATT.

1) Test regimen – Metformin + Isoniazid + Rifampicin+ Pyrazinamide + Ethambutol daily [2MetHREZ<sub>7</sub>] or

2) Control regimen – Isoniazid+ Rifampicin + Pyrazinamide + Ethambutol daily [2HRZE<sub>7</sub>]

After 2-months, all study participants in both the arms will receive the standard 4-month continuation phase of HRE daily. Treatment will be supervised and directly observed at a health facility or by directly observed therapy (DOT) provider. Metformin will be dosed at 500 mg once daily for the 1<sup>st</sup> week and then 1000mg once daily for the remaining period of 7 weeks. Dosing of the other anti-TB drugs will be based on weight bands as shown in table 2.

We will centrally procure all drugs (H, R, E, Z, and Met) to be used in the trial, check for their stated content by validated methods using High-Performance Liquid Chromatography at NIRT Clinical pharmacology department, before dispatching it to the enrolling sites for administration to patients.

**Table 2: Weight-based dosing of anti-tuberculosis drugs**

| Weight Band | Isoniazid | Rifampicin | Pyrazinamide | Ethambutol |
|-------------|-----------|------------|--------------|------------|
| 30-39 kg    | 150 mg    | 300 mg     | 800 mg       | 550 mg     |
| 40-54 kg    | 225 mg    | 450 mg     | 1200 mg      | 825 mg     |
| 55-65 kg    | 300 mg    | 600 mg     | 1600 mg      | 1100 mg    |

1  
2  
3 Treatment allocation: Permuted block Randomization will be done centrally using a  
4 computer-generated list of random numbers, stratified by presence or absence of cavities in chest  
5 x-ray and highest sputum smear grading at baseline ( $<2$  or  $\geq 2$ ). Separate randomization lists for  
6 each combination of strata for each site will be prepared in advance by an independent  
7 statistician, using varying block sizes. Allocation codes will be generated at the central location  
8 and at the time of patient's admission to the study, the primary statistician through e-mail will  
9 inform the site the regimen based on appropriate stratification factors.  
10  
11  
12  
13  
14  
15  
16  
17  
18

19 Recruitment process: We will screen all newly diagnosed sputum smear-positive  
20 pulmonary TB patients attending the chest clinics at the study sites for study eligibility. Table 3  
21 details the various study procedures. At their first visit, the study will be explained, including the  
22 potential risks and benefits associated with participation. We will obtain informed written  
23 consent before any protocol-specific screening procedures are carried out. Consenting  
24 participants will undergo sputum testing for smear, culture (both solid and liquid media) and  
25 rifampicin resistance testing by GeneXpert. Blood samples will be obtained for HIV antibodies  
26 (unless the patient is already known to be HIV positive), liver and renal function tests and blood  
27 sugar levels. Patients will be re-assessed for eligibility when returning with their investigation  
28 results. Those patients who do not have rifampicin resistance and are willing to take part in the  
29 study will sign an enrolment consent form (or a thumb-print in the presence of a witness, if  
30 illiterate), and randomized to one of the study regimens. During the first two months of  
31 treatment, all patients will undergo weekly sputum testing for *M.tb* by smear, liquid, and solid  
32 cultures and sparse pharmacokinetics of ATT drugs and metformin. A subset of patients will  
33 undergo intense pharmacokinetic study. Randomized patients have an additional blood  
34 investigation for immunological and autophagy biomarkers (T-cell, monocyte & dendritic cell  
35  
36  
37  
38  
39  
40  
41  
42  
43  
44  
45  
46  
47  
48  
49  
50  
51  
52  
53  
54  
55  
56  
57  
58  
59  
60

1  
2  
3 functions both ex-vivo and following stimulation with TB antigens including PPD and ESAT-  
4  
5 6/CFP-10, estimation of CRP, TNF- $\alpha$ , and other cytokines) pre and post metformin containing  
6  
7 ATT.  
8  
9

10 We will refer patients ineligible or unwilling to participate in the study to the national  
11  
12 programme for treatment as per the existing guidelines.  
13  
14  
15  
16  
17  
18  
19  
20  
21  
22  
23  
24  
25  
26  
27  
28  
29  
30  
31  
32  
33  
34  
35  
36  
37  
38  
39  
40  
41  
42  
43  
44  
45  
46  
47  
48  
49  
50  
51  
52  
53  
54  
55  
56  
57  
58  
59  
60

For peer review only

1  
2  
3  
4  
5  
6  
7  
8  
9  
10  
11  
12  
13  
14  
15  
16  
17  
18  
19  
20  
21  
22  
23  
24  
25  
26  
27  
28  
29  
30  
31  
32  
33  
34  
35  
36  
37  
38  
39  
40  
41  
42  
43  
44  
45  
46  
47

**Table 3: Study schedule of enrolment, interventions, and assessments.**

|     |                                                             | STUDY PERIOD   |            |                                       |     |     |     |     |     |     |     |                                               |     |     |     |           |   |
|-----|-------------------------------------------------------------|----------------|------------|---------------------------------------|-----|-----|-----|-----|-----|-----|-----|-----------------------------------------------|-----|-----|-----|-----------|---|
|     |                                                             | ENROLMENT      | ALLOCATION | INTENSIVE PHASE OF ATT (TRIAL PERIOD) |     |     |     |     |     |     |     | CONTINUATION PHASE OF ATT (POST-TRIAL PERIOD) |     |     |     | CLOSE OUT |   |
| I   | ENROLMENT                                                   | Baseline (-D7) | W 0        | W 1                                   | W 2 | W 3 | W 4 | W 5 | W 6 | W 7 | W 8 | M 3                                           | M 4 | M 5 | M 6 | M 7       |   |
| 1   | Informed consent                                            | x              |            |                                       |     |     |     |     |     |     |     |                                               |     |     |     |           |   |
| 2   | Eligibility Screen (including lab tests)                    | x              |            |                                       |     |     |     |     |     |     |     |                                               |     |     |     |           |   |
| 3   | Sputum Gene Xpert                                           | x              |            |                                       |     |     |     |     |     |     |     |                                               |     |     |     |           |   |
| 4   | HIV, Hepatitis B & C                                        | x              |            |                                       |     |     |     |     |     |     |     |                                               |     |     |     |           |   |
| II. | ALLOCATION                                                  |                | x          |                                       |     |     |     |     |     |     |     |                                               |     |     |     |           |   |
| III | TRIAL REGIMENS                                              |                |            |                                       |     |     |     |     |     |     |     |                                               |     |     |     |           |   |
|     | Test Regimen (Metformin containing ATT)                     |                | x          | x                                     | x   | x   | x   | x   | x   | x   | x   |                                               |     |     |     |           |   |
|     | Control regimen (Only ATT)                                  |                |            | x                                     | x   | x   | x   | x   | x   | x   | x   |                                               |     |     |     |           |   |
|     | Continuation Phase of ATT (For both groups)                 |                |            |                                       |     |     |     |     |     |     |     | x                                             | x   | x   | x   |           |   |
| IV  | ASSESSMENTS                                                 |                |            |                                       |     |     |     |     |     |     |     |                                               |     |     |     |           |   |
| 1   | Clinical Evaluation                                         | x              | x          | x                                     | x   | x   | x   | x   | x   | x   | x   | x                                             | x   | x   | x   | x         |   |
| 2   | Sociological Assessment                                     | x              | x          |                                       |     |     | x   |     |     |     | x   | x                                             | x   | x   | x   | x         |   |
| 3   | Sputum smear & culture (MGIT, LJ)                           | x              |            | x                                     | x   | x   | x   | x   | x   | x   | x   | x                                             | x   | x   | x   |           |   |
| 4   | Urine Pregnancy tests / Sugar / Alb                         | x              |            |                                       |     |     | x   |     |     |     | x   | x                                             | x   | x   | x   |           |   |
| 5   | HbA1c                                                       | x              |            |                                       |     |     |     |     |     |     | x   |                                               |     |     | x   |           |   |
| 6   | CBC, LFT, RFT, Lactic acid , peripheral smear & chest x-ray | x              |            |                                       |     |     | x   |     |     |     | x   |                                               |     |     | x   |           |   |
| 7   | Random blood sugar                                          | x              |            |                                       | x   |     | x   |     | x   |     | x   |                                               |     |     | x   |           |   |
| 8   | Pharmacokinetics & genomics                                 |                |            |                                       |     |     | x   |     |     |     | x   |                                               |     |     |     |           |   |
| 9   | Immunological studies                                       |                | x          |                                       |     |     |     |     |     |     | x   |                                               |     |     | x   |           |   |
| 10  | Storage Plasma/cell sample                                  |                | x          |                                       |     |     | x   |     |     |     | x   |                                               |     |     | x   |           |   |
| V   | OUTCOMES                                                    |                |            |                                       |     |     |     |     |     |     |     |                                               |     |     |     |           | x |

1  
2  
3 Treatment delivery, compliance, and retention: ATT will be administered under direct  
4 observation for 6-days of the week and supplied for the seventh day. Study staff will reinforce  
5 the importance of adherence to the treatment schedule at each visit. If the patient misses drug  
6 doses in the intensive phase (IP) or continuation phase (CP), it will be compensated at the end of  
7 the respective stages over next 15 days, so that the patient receives 60 doses of the assigned  
8 regimen in the IP and 120 doses in the CP. Treatment supporters and enablers will facilitate  
9 retention of the participants in the study. All treatment is ambulatory and delivered by dedicated  
10 DOT provider. We will assess treatment adherence through reviews of treatment card throughout  
11 the treatment phase. In case of drug supply for any reason, empty pill cover count will determine  
12 adherence. Treatment adherence will be enhanced by – reimbursing the transport costs and loss  
13 of wages incurred by the participant during the study visits. During the study period, participants  
14 will receive food supplement every month and meals during their extended, study visits.  
15  
16  
17  
18  
19  
20  
21  
22  
23  
24  
25  
26  
27  
28  
29

30 Concomitant medication while in the trial: Concomitant antibiotic treatments of any kind  
31 are discouraged during the study period. If required, their usage is restricted for a short course (<  
32 2 weeks) period. Concomitant non-antibiotic drug usage is allowed in small quantity. Only those  
33 considered necessary for the subject's welfare and are unlikely to interfere with the study  
34 medication, may be given at the discretion of the investigator. Below are the drugs used to treat  
35 *M. tb* infections which should not be used during this trial: Streptomycin, Thiacetazone, PAS,  
36 Dapsone, Amoxicillin-clavulanic acid/ clavulanate, Clofazimine, Capreomycin, any  
37 oxazolidinone antibiotic (e.g., linezolid), Ofloxacin, Levofloxacin or Moxifloxacin.  
38  
39  
40  
41  
42  
43  
44  
45  
46  
47  
48

49 Criteria for Discontinuation/ Withdrawal of study participants: Withdrawal of study  
50 participants can occur for any of the following reasons – Pregnancy, if the investigators feel that  
51 staying in the study is harmful to the patient, if the patient does not follow study procedures or is  
52  
53  
54  
55  
56  
57



1  
2  
3 not available for appointments, if the study sponsor or NIRT or representative of the Drugs  
4  
5  
6  
7  
8  
9  
10  
11  
12  
13  
14  
15  
16  
17  
18  
19  
20  
21  
22  
23  
24  
25  
26  
27  
28  
29  
30  
31  
32  
33  
34  
35  
36  
37  
38  
39  
40  
41  
42  
43  
44  
45  
46  
47  
48  
49  
50  
51  
52  
53  
54  
55  
56  
57  
58  
59  
60

not available for appointments, if the study sponsor or NIRT or representative of the Drugs  
Controller General of India decide to stop or cancel the study, if the Data and Safety Monitoring  
Board recommends halting the study or if the patient wishes to withdraw for any reasons. In such  
cases, appropriate treatment, as per the standard of care treatment available then will be ensured  
for patients taking into consideration the drug susceptibility pattern of the individual.

*Study Outcomes:* The primary outcome is the time to sputum culture conversion, which is  
assessed by the time interval between the date of treatment initiation and the date of acquisition  
of the first of at least two consecutive negative cultures taken at least eight days apart. We will  
also assess, on a weekly basis, the time to positivity, a change in *M.tb* log<sub>10</sub> colony forming units  
(CFU) in culture and the proportion of participants with sputum culture negativity in the two  
treatment arms.

The PK, the area under the concentration curve (AUC), will be assessed through blood sampling  
on a single day during the first month of ATT, after a minimum of seven doses of RMP and  
MET (1000mg). We will estimate the Minimum inhibitory concentration (MIC) of each  
participant's pre-treatment infecting isolate from early morning and overnight sputum samples  
collected at the pre-treatment visit. We will also compare the Genomics results of Metformin and  
Rifampicin with the plasma concentration of these drugs, bacteriological and clinical endpoints  
along with the drug-drug interaction of metformin and rifampicin.

For the occurrence of Treatment-Emergent Adverse Events (TEAEs), clinical  
investigators will grade clinical and laboratory abnormalities according to the modified Adult  
Toxicity Table for the Division of Microbiology and Infectious Diseases, National Institutes of  
Health [10]. The safety and tolerability analysis will include all patients who were randomized to  
and received at least one dose of the study regimen.

1  
2  
3 *Participant Timeline:* The trial will consist of three stages - Screening and enrolment (a  
4 maximum of 1 week); the Intensive phase of treatment with or without test drug (2 months)  
5 followed by a continuation phase of standard drugs (4 months). Table 3 shows the schedule of  
6 enrolment, interventions, and assessments of participants in the trial.  
7  
8  
9  
10  
11  
12

13 *Patient and public involvement:* Patients were not involved in the development of the  
14 research question, or the design of this study as the scientific problem is still not proven and only  
15 in the research arena. However, considering the relevance of the study outcome to public health,  
16 and policy-makers, the study is discussed in our Institutional Scientific advisory committee,  
17 Institutional Ethics committee and Community Advisory Board consisting of a representative  
18 from affected community, peers and responsible members of the society. Patients will be  
19 involved in the recruitment and conduct of the study. We will disseminate the results of the study  
20 widely through meetings, workshops, conference presentation, and publication  
21  
22  
23  
24  
25  
26  
27  
28  
29  
30  
31  
32

33 *Sample Size Assumption:* Published literature has shown a median time to sputum culture  
34 conversion by a liquid medium with daily ATT to be 32 days [11]. With the addition of  
35 metformin, we assumed a 30% reduction in the time to culture conversion, i.e., to approximately  
36 22 days. We estimated that we would require 150 new sputum smear-positive patients to show  
37 this difference at 80% power, an alpha level of 0.05 and a hazards ratio of 1.5. With the  
38 assumption that 5% of patients will be lost to follow-up or not assessable in the primary analysis,  
39 a total target sample size of 158 patients in each treatment arm will be recruited, totaling to 316  
40 patients for the study.  
41  
42  
43  
44  
45  
46  
47  
48  
49  
50

51 *Randomization Procedures:* Permuted block Randomization will be done centrally using a  
52 computer-generated list of random numbers, stratified by presence or absence of cavities on  
53 chest x-ray and highest sputum smear grading (<2 or >2). The randomization sequence will not  
54  
55  
56  
57  
58  
59  
60

1  
2  
3 be available to those who enroll participants. Allocation codes will be generated at the central  
4 site, NIRT and will take place at the time of patient's admission to the study. Upon receiving an  
5 electronic-mail request from the study sites, for allocation of a participant to the study, the NIRT  
6  
7  
8  
9  
10  
11  
12  
13  
14  
15  
16  
17  
18  
19  
20  
21  
22  
23  
24  
25  
26  
27  
28  
29  
30  
31  
32  
33  
34  
35  
36  
37  
38  
39  
40  
41  
42  
43  
44  
45  
46  
47  
48  
49  
50  
51  
52  
53  
54  
55  
56  
57  
58  
59  
60

He/She will then inform the site physician, through e-mail, the study regimen along with the unique study ID for patient enrolment to the study.

*Data Collection, Management, and Interim Analysis:* Study randomization will be done centrally by the Central Data management (CDM) unit at NIRT, Chennai over e-mail. During the study conduct, data will be collected at sites at baseline and follow-up on pre-defined case record forms (CRF) and transmitted electronically to the CDM unit. Data correctness and completeness will be checked before sending. The central team will also conduct a periodic quality check of the data. Data collected will include a) improvement in disease status regarding abatement of symptoms, signs and sputum cultures conversion and b) safety and tolerability of the regimen concerning both clinical and laboratory adverse events.

During the trial all essential trial documents including the source documents, informed consent forms, etc. will be stored securely under lock and key at the recruiting sites under the supervision of the site investigator. All e-data will be password protected with limited access to the investigator and their teams alone. The study team will retain the records for a minimum period of five years after completion of the study.

The study has two interim analyses planned, viz. after 33% and 66% of the enrolled patients have completed 8-weeks of Metformin treatment and with sputum culture results available for review. The study also has an additional interim analysis for reported serious

1  
2  
3 adverse events with frequency higher than anticipated. The final analysis will include all enrolled  
4 patients when they have completed six months of ATT.  
5  
6

7  
8 Study Outcome analysis: The primary efficacy analysis will compare the median time to  
9 culture negativity. This analysis will happen when the last enrolled patient has completed eight  
10 weeks of treatment and will be done using culture results from liquid culture (MGIT) and in  
11 those who are not isoniazid or RMP mono-resistant at baseline. Both a Modified Intent to Treat  
12 (MITT) and a Per Protocol (PP) analysis will be conducted. Secondary outcome parameters will  
13 include proportion and time to sputum culture positivity using the MGIT system. The safety and  
14 tolerability analysis will consist of all patients who were randomized to and received at least one  
15 dose of the drug. Based on plasma drug concentrations obtained at different time points, we will  
16 calculate certain pharmacokinetic variables related to study drugs. Drug peak concentrations  
17 (Cmax) and exposure (AUC) will be linked to time to sputum conversion and occurrence of  
18 adverse events  
19  
20  
21  
22  
23  
24  
25  
26  
27  
28  
29  
30  
31  
32

33 Data Safety Monitoring Board (DSMB): The DSMB for this study comprises of TB  
34 clinicians, pharmacokinetic specialists, and an independent biostatistician. They will review data  
35 from this trial on a regular basis, including incidence progress of the trial, and detect evidence of  
36 early safety issues for the trial participants with a specific focus on grade 3 or 4 AEs, SAEs, and  
37 treatment discontinuations due to AE. Based on the results, DSMB shall make recommendations  
38 on continuing or terminating / modifications to the trial.  
39  
40  
41  
42  
43  
44  
45  
46

47 Clinical Site Monitoring & Quality assurance: An independent study Monitor, appointed  
48 by the sponsor, will be responsible for monitoring data quality by trial Standard Operating  
49 Procedures. Based on the monitoring plan, field visit and audit will be performed at different  
50 stages. All participant records, CRFs, and other source documents for the patients recruited in  
51  
52  
53  
54  
55  
56  
57  
58  
59  
60

1  
2  
3 this study will be made available for review by the monitors. A meeting of the investigators of  
4 each local site will convene monthly via web-based remote conference system to share the  
5 progress of the study and discuss with the problems met during the trial conduct. During the  
6  
7  
8  
9  
10  
11  
12  
13  
14  
15  
16  
17  
18  
19  
20  
21  
22  
23  
24  
25  
26  
27  
28  
29  
30  
31  
32  
33  
34  
35  
36  
37  
38  
39  
40  
41  
42  
43  
44  
45  
46  
47  
48  
49  
50  
51  
52  
53  
54  
55  
56  
57  
58  
59  
60

conduct of the research, any critical protocol modifications will be informed to the IEC, trial registry and if relevant to the trial participants.

Confidentially of trial data: The processing of personal data in this trial will be limited to those data that are reasonably necessary to investigate the antibacterial activity, safety, and tolerability of the investigational product used in this trial. These data will be processed with adequate precautions to ensure confidentiality. Trained professional will collect all study data with the utmost sensitivity and confidentiality. The study participant will be informed during the informed consent process that - the monitor(s), the IEC, and the regulatory authorities will be granted direct access to the participant's original medical records for verification of clinical trial procedures and/or data, without violating the confidentiality of the participant, to the extent permitted by the applicable laws. Otherwise, only the study investigator and his/her team will have access to the trial data.

### **Ethics and Dissemination**

This trial will proceed as per the current ICH Good Clinical Practice and the ICMR Ethical guidelines for biomedical research in human participants. Compliance with this standard provides public assurance that the rights, safety, and well-being of trial subjects are protected; consistent with the principles that have their origin in the Declaration of Helsinki, and that the clinical trial data are credible. The confidentiality of the study participants will be protected throughout the study period as per provision in the Indian-GCP & applicable regulations by laws

1  
2  
3 of India. The processing of personal data in this trial will be limited to those data that are  
4 reasonably necessary to investigate the antibacterial activity, safety, and tolerability of the  
5 investigational product used in this trial.  
6  
7

8  
9  
10 The study principal investigator holds primary responsibility for the preparation of manuscripts  
11 and materials for result dissemination and publication. Once the trial is complete, the  
12 investigators anticipate publishing results of this study in several peer-reviewed scientific  
13 journals, present the abstracts in meetings, to stakeholders and policymakers and share the results  
14 widely with the Programme managers. During all these processes, details of the trial participant  
15 will remain confidential.  
16  
17  
18  
19  
20  
21  
22  
23

## 24 25 26 **Discussions:**

27  
28 Currently, for the management of new sputum smear-positive drug-sensitive pulmonary  
29 TB patients, 6-month regimens are used in more than 90 countries that are evaluated to be  
30 effective [12]. Newer anti-TB drugs are also in the pipeline. However, all types of treatment  
31 currently available are pathogen-targeted and with toxic drugs. Drug-toxicity can lead to poor  
32 treatment adherence resulting in treatment failure and development of resistance. As the  
33 pathogen-targeted strategies may lead to the development of acquired microbial resistance, new  
34 “host-targeted” adjunct therapeutic approaches not only are less likely to engender microbial  
35 resistance but also augment protective host immune responses thus accelerating bacterial  
36 clearance from the system.  
37  
38  
39  
40  
41  
42  
43  
44  
45  
46  
47

48  
49 Metformin has an inhibitory effect on mitochondrial complex I, inhibition of which has  
50 been found to increase the AMP/ATP ratio [13, 14]. The altered cellular energy status induces  
51 activation of AMPK, a serine/threonine kinase, and acts as an energy sensor [15]. Activation of  
52  
53  
54  
55  
56  
57

1  
2  
3 AMPK by metformin stimulates endothelial nitric oxide synthase (eNOS) activity which leads to  
4 bacterial killing [16]. Metformin also acts through AMPK-independent mechanisms. It promotes  
5 phagocytosis, phagolysosome fusion & autophagy in macrophages. Macrophages exposed to  
6 metformin had higher bactericidal capacity attributed to increased mitochondrial Reactive  
7 Oxidative Species (ROS) production required for bacterial killing [17]. Approximately 90% of  
8 the newly diagnosed sputum positive patients are sensitive to isoniazid (H) and rifampicin (R),  
9 adding the drug metformin would have a beneficial effect in the early killing of intracellular  
10 bacteria by influencing the host immunity. Experiments in mice treated with MET (200 mg/kg)  
11 along with H 10mg/kg showed not only a considerable reduction in the bacillary load in the  
12 lungs but also reduced areas of lung tissue damage compared to H-alone treatment [9]. This dose  
13 of MET is equivalent to approximately 1200 mg/day for a 60-kg human and this dose of MET  
14 will be used in this trial along with H, R, E and Z in the intensive phase of daily ATT. High dose  
15 of metformin has also been used in clinical practice for the management of diabetic individuals  
16 with and without TB and in non-diabetic conditions like polycystic ovarian syndrome and  
17 obesity [18, 19]. Though the WHO recommends 2HRZE/4HR regimen for new patients with  
18 PTB, given the high prevalence of Isoniazid resistance in the country (11% in new sputum  
19 positive patients), the Revised National TB control programme of India recommends using three  
20 drugs in the continuation phase i.e. 2HRZE/4HRE regimen which will be followed in this trial  
21 [20].  
22  
23  
24  
25  
26  
27  
28  
29  
30  
31  
32  
33  
34  
35  
36  
37  
38  
39  
40  
41  
42  
43  
44  
45  
46  
47

48 We are proposing a Phase IIB trial looking at sputum-culture conversion to negative over  
49 a 2-month period as studies have shown a correlation between positive 2-month sputum-culture  
50 status and subsequent relapse. However, limitations of this design include the binary outcome of  
51 2-month sputum-culture endpoint, hence requiring larger samples size to prove the benefit. To  
52  
53  
54  
55  
56  
57

1  
2  
3 overcome this limitation, we plan serial sputum colony counting (SSCC) and time-to-detection  
4 (TTD). SSCC involves counting of viable mycobacterium tuberculosis bacilli at various time  
5  
6 points during the 8-week period. This measurement will demonstrate the rapid bacillary killing in  
7  
8 the early phase and track the rate and pattern of culture conversion through-out the 8-weeks,  
9  
10 thereby providing a better marker for culture conversion [21]. However, TTD in liquid culture is  
11  
12 considered an even better choice than SSCC as the complications of counting viable colonies is  
13  
14 replaced by automated measurement of detection time of the bacilli through-out the 8-week  
15  
16 period. In our study, as the outcome measures of interest (primarily bacteriological) are based on  
17  
18 objective microbiology, the bacteriology laboratory staff will be blinded to the patient's  
19  
20 treatment. Safety assessments will be defined as objectively as possible, using pre-defined  
21  
22 grading criteria for laboratory abnormalities and adverse events. The pharmacokinetic aspect of  
23  
24 the study is based on a population approach which is facilitated by the intensive-sparse sampling  
25  
26 design. The study will estimate the pharmacokinetic exposure (AUC<sub>0-24</sub>) for all study  
27  
28 participants. Several alternative biomarkers of treatment response are also being evaluated using  
29  
30 these samples.  
31  
32  
33  
34  
35  
36  
37  
38

39 Results from METRIF study will complement observations from other retrospective and  
40  
41 case-control studies that showed metformin to be a protective agent against TB infection among  
42  
43 people with diabetes [22, 23]. As studies did not show any dose-dependent protection in  
44  
45 metformin users for TB, we will be using 500mg dose for the first week followed by 1000mg for  
46  
47 the remaining 7-weeks. This dose escalation is being done to reduce the gastrointestinal side  
48  
49 effects of metformin. If the study regimen is successful, it will pave the way to evaluate shorter  
50  
51 regimens for the treatment of PTB. This trial will establish a new standard of care for DS-PTB  
52  
53 that will not only reduce the number of required clinic visits by the patients but also decrease the  
54  
55  
56  
57  
58  
59  
60



1  
2  
3 proportion of patients who fail to complete the full course of therapy. It should also reduce the  
4  
5 overall burden on the health care system. If the study regimens are shown to be superior or at  
6  
7 least non-inferior to the control regimen, then the procedure represents an even greater advantage  
8  
9 for both patients and TB control programmes throughout the world.  
10  
11  
12  
13  
14  
15  
16  
17  
18  
19  
20  
21  
22  
23  
24  
25  
26  
27  
28  
29  
30  
31  
32  
33  
34  
35  
36  
37  
38  
39  
40  
41  
42  
43  
44  
45  
46  
47  
48  
49  
50  
51  
52  
53  
54  
55  
56  
57  
58  
59  
60

For peer review only

## REFERENCES

1. Global Tuberculosis Report 2017. World Health Organization. Geneva. Accessed from [http://www.who.int/tb/publications/global\\_report/en/](http://www.who.int/tb/publications/global_report/en/)
2. Kuijl C, Savage ND, Marsman N, et al. Intracellular bacterial growth is controlled by a kinase network around PKB/AKT1. *Nature* 2007; 450 (7170): 725-30.
3. Ejim L, Farha MA, Falconer SB, et al. Combinations of antibiotics and nonantibiotic drugs enhance antimicrobial efficacy. *Nat. Chem. Biol.* 2011; 7, 348–350.
4. Bhatt K, Salgame P. Host innate immune response to *Mycobacterium tuberculosis*. *J. Clin. Immunol.* 2007; 27, 347–362.
5. Behar SM, Divangahi M, Remold H. Evasion of innate immunity by *Mycobacterium tuberculosis*: Is death an exit strategy? *Nat. Rev. Microbiol.* 2010; 8, 668–674
6. Gutierrez MG, Master SS, Singh SB et al. Autophagy is a defense mechanism inhibiting BCG and *Mycobacterium tuberculosis* survival in infected macrophages. *Cell* 2004; 119, 753–766.
7. Kim J, Kundu M, Violet B, et al. AMPK, and mTOR regulate autophagy through direct phosphorylation of Ulk1. *Nat. Cell Biol.* 2011; 13, 132–141.
8. Kumar D, Nath L, Kamal MA et al. Genome-wide analysis of the host intracellular network that regulates survival of *Mycobacterium tuberculosis*. *Cell* 2010; 140, 731–743.
9. Singhal A, Jie L, Kumar P et al. Metformin as adjunct antituberculosis therapy. *Science Translational Medicine* 2014; 6: 263
10. Division of AIDS (DAIDS) Table for Grading the Severity of Adult and Pediatric Adverse Events. Version 2.1, March 2017. Accessed on 29<sup>th</sup> March 2018. Available from <https://rsc.tech-res.com/docs/default-source/safety/daids-ae-grading-table-mar2017.pdf>
11. Wang JY, Wang JT, Tsai TH et al. Adding moxifloxacin is associated with a shorter time to culture conversion in pulmonary tuberculosis. *Int J Tuberc Lung Dis* 2010; 14(1): 65-71.
12. Fox W, Ellard GA, Mitchinson DA. Studies on the treatment of tuberculosis undertaken by the British Medical Research Council tuberculosis units, 1946–1986, with relevant subsequent publications. *Int J Tuberc Lung Dis.* 1999; 3(10): S231–79.
13. El-Mir MY, Nogueira V, Fontaine E, et al. Dimethylbiguanide inhibits cell respiration via an indirect effect targeted on the respiratory chain complex I. *J Biol Chem.* 2000; 275:223–8.

14. Owen MR, Doran E, Halestrap AP. Evidence that metformin exerts its anti-diabetic effects through inhibition of complex 1 of the mitochondrial respiratory chain. *Biochem J.* 2000; 348: 607–14.
15. Hardie DG. The AMP-activated protein kinase pathway: new players upstream and downstream. *J Cell Sci.*2004; 117: 5479–87.
16. Davis BJ, Xie Z, Viollet B, et al. Activation of the AMP-activated kinase by anti-diabetes drug metformin stimulates nitric oxide synthesis in vivo by promoting the association of heat shock protein 90 and endothelial nitric oxide synthase. *Diabetes* 2006; 55: 496– 505.
17. Hor-Yue Tan, Ning Wang, Sha Li, Ming Hong, Xuanbin Wang, Yibin Feng. The Reactive Oxygen Species in Macrophage Polarization: Reflecting Its Dual Role in Progression and Treatment of Human Diseases. *Oxid Med Cell Longev.* 2016; 2016: 2795090.
18. Lord JM, Flight IHK, Norman RJ. Metformin in polycystic ovary syndrome: Systematic review and meta-analysis. *Br Med J* 2003; 327: 951
19. Levri KM, Slaymaker E, Last A et al. Metformin as a treatment for overweight and obese adults. *Ann Fam Med* 2005; 3 (5): 457-461
20. Technical and Operational Guidelines for TB Control in India 2016 Accessed on 17<sup>th</sup> November 2018. Available from <https://tbcindia.gov.in/showfile.php?lid=3219>
21. Bark CM, Furin JJ, Johnson JL. Approaches to clinical trials of new anti-TB drugs. *Clin. Invest* 2012; 2(4): 359–370
22. Sullivan T, Amor BY. The co-management of tuberculosis and diabetes: Challenges and opportunities in the developing world. *PLOS Med.* 2012; 9, e1001269.
23. Marupuru S, Senapati P, Pathadka S et al. Protective effect of metformin against tuberculosis infections in diabetic patients: an observational study of south Indian tertiary healthcare facility. *Braz J Infect Dis* 2017; 21(3): 312-316

- 1  
2  
3  
4  
5  
6 • **Authors' contributions:** CPP, SS, RG & TB – conceived & designed the study / CPP,  
7  
8 PKB, MN, CPR, HK, NSG, MSJ, MS, & SS – development, and writing of the study  
9  
10 protocol and this manuscript  
11  
12  
13 • **Funding:** India TB Research Consortium, Indian Council of Medical Research, New  
14  
15 Delhi and Open Source Pharma Foundation, Bangalore, India provided funding for the  
16  
17 study. Trial Sponsor: Indian Council of Medical Research – National Institute for  
18  
19 Research in Tuberculosis  
20  
21  
22 • **Competing interests:** None  
23  
24  
25  
26  
27  
28  
29  
30  
31  
32  
33  
34  
35  
36  
37  
38  
39  
40  
41  
42  
43  
44  
45  
46  
47  
48  
49  
50  
51  
52  
53  
54  
55  
56  
57  
58  
59  
60

1  
2  
3  
4  
5  
6  
7  
8  
9  
10  
11  
12  
13  
14  
15  
16  
17  
18  
19  
20  
21  
22  
23  
24  
25  
26  
27  
28  
29  
30  
31  
32  
33  
34  
35  
36  
37  
38  
39  
40  
41  
42  
43  
44  
45  
46  
47  
48  
49  
50  
51  
52  
53  
54  
55  
56  
57  
58  
59  
60

For peer review only



SPIRIT 2013 Checklist: Recommended items to address in a clinical trial protocol and related documents\*

| Section/item                      | Item No | Description                                                                                                                                                                                                                                                                              | Addressed on page number |
|-----------------------------------|---------|------------------------------------------------------------------------------------------------------------------------------------------------------------------------------------------------------------------------------------------------------------------------------------------|--------------------------|
| <b>Administrative information</b> |         |                                                                                                                                                                                                                                                                                          |                          |
| Title                             | 1       | Descriptive title identifying the study design, population, interventions, and, if applicable, trial acronym                                                                                                                                                                             | ___ 1 ___                |
| Trial registration                | 2a      | Trial identifier and registry name. If not yet registered, name of intended registry                                                                                                                                                                                                     | ___ 3 ___                |
|                                   | 2b      | All items from the World Health Organization Trial Registration Data Set                                                                                                                                                                                                                 | ___ n/a ___              |
| Protocol version                  | 3       | Date and version identifier                                                                                                                                                                                                                                                              | ___ 15 ___               |
| Funding                           | 4       | Sources and types of financial, material, and other support                                                                                                                                                                                                                              | ___ 15 ___               |
| Roles and responsibilities        | 5a      | Names, affiliations, and roles of protocol contributors                                                                                                                                                                                                                                  | ___ 16 ___               |
|                                   | 5b      | Name and contact information for the trial sponsor                                                                                                                                                                                                                                       | ___ 16 ___               |
|                                   | 5c      | Role of study sponsor and funders, if any, in study design; collection, management, analysis, and interpretation of data; writing of the report; and the decision to submit the report for publication, including whether they will have ultimate authority over any of these activities | ___ 16 ___               |
|                                   | 5d      | Composition, roles, and responsibilities of the coordinating centre, steering committee, endpoint adjudication committee, data management team, and other individuals or groups overseeing the trial, if applicable (see Item 21a for data monitoring committee)                         | ___ 12 ___               |

1  
2  
3  
4  
5  
6  
7  
8  
9  
10  
11  
12  
13  
14  
15  
16  
17  
18  
19  
20  
21  
22  
23  
24  
25  
26  
27  
28  
29  
30  
31  
32  
33  
34  
35  
36  
37  
38  
39  
40  
41  
42  
43  
44  
45  
46  
47

## Introduction

|                          |    |                                                                                                                                                                                                           |   |
|--------------------------|----|-----------------------------------------------------------------------------------------------------------------------------------------------------------------------------------------------------------|---|
| Background and rationale | 6a | Description of research question and justification for undertaking the trial, including summary of relevant studies (published and unpublished) examining benefits and harms for each intervention        | 4 |
|                          | 6b | Explanation for choice of comparators                                                                                                                                                                     | 5 |
| Objectives               | 7  | Specific objectives or hypotheses                                                                                                                                                                         | 5 |
| Trial design             | 8  | Description of trial design including type of trial (eg, parallel group, crossover, factorial, single group), allocation ratio, and framework (eg, superiority, equivalence, noninferiority, exploratory) | 5 |

## Methods: Participants, interventions, and outcomes

|                      |     |                                                                                                                                                                                                                                                                                                                                                                                |         |
|----------------------|-----|--------------------------------------------------------------------------------------------------------------------------------------------------------------------------------------------------------------------------------------------------------------------------------------------------------------------------------------------------------------------------------|---------|
| Study setting        | 9   | Description of study settings (eg, community clinic, academic hospital) and list of countries where data will be collected. Reference to where list of study sites can be obtained                                                                                                                                                                                             | 6       |
| Eligibility criteria | 10  | Inclusion and exclusion criteria for participants. If applicable, eligibility criteria for study centres and individuals who will perform the interventions (eg, surgeons, psychotherapists)                                                                                                                                                                                   | 6       |
| Interventions        | 11a | Interventions for each group with sufficient detail to allow replication, including how and when they will be administered                                                                                                                                                                                                                                                     | 6 & 7   |
|                      | 11b | Criteria for discontinuing or modifying allocated interventions for a given trial participant (eg, drug dose change in response to harms, participant request, or improving/worsening disease)                                                                                                                                                                                 | 10      |
|                      | 11c | Strategies to improve adherence to intervention protocols, and any procedures for monitoring adherence (eg, drug tablet return, laboratory tests)                                                                                                                                                                                                                              | 10      |
|                      | 11d | Relevant concomitant care and interventions that are permitted or prohibited during the trial                                                                                                                                                                                                                                                                                  | 10      |
| Outcomes             | 12  | Primary, secondary, and other outcomes, including the specific measurement variable (eg, systolic blood pressure), analysis metric (eg, change from baseline, final value, time to event), method of aggregation (eg, median, proportion), and time point for each outcome. Explanation of the clinical relevance of chosen efficacy and harm outcomes is strongly recommended | 11      |
| Participant timeline | 13  | Time schedule of enrolment, interventions (including any run-ins and washouts), assessments, and visits for participants. A schematic diagram is highly recommended (see Figure)                                                                                                                                                                                               | 12 & 20 |

1  
2  
3 Sample size 14 Estimated number of participants needed to achieve study objectives and how it was determined, including \_\_\_\_\_12\_\_\_\_\_  
4 clinical and statistical assumptions supporting any sample size calculations

5  
6 Recruitment 15 Strategies for achieving adequate participant enrolment to reach target sample size \_\_\_\_\_9\_\_\_\_\_  
7

8 **Methods: Assignment of interventions (for controlled trials)**  
9

10 Allocation:

11  
12 Sequence generation 16a Method of generating the allocation sequence (eg, computer-generated random numbers), and list of any \_\_\_\_\_12\_\_\_\_\_  
13 factors for stratification. To reduce predictability of a random sequence, details of any planned restriction  
14 (eg, blocking) should be provided in a separate document that is unavailable to those who enrol participants  
15 or assign interventions  
16

17 Allocation concealment mechanism 16b Mechanism of implementing the allocation sequence (eg, central telephone; sequentially numbered, \_\_\_\_\_12\_\_\_\_\_  
18 opaque, sealed envelopes), describing any steps to conceal the sequence until interventions are assigned  
19  
20

21 Implementation 16c Who will generate the allocation sequence, who will enrol participants, and who will assign participants to \_\_\_\_\_12\_\_\_\_\_  
22 interventions  
23

24 Blinding (masking) 17a Who will be blinded after assignment to interventions (eg, trial participants, care providers, outcome \_\_\_\_\_n/a\_\_\_\_\_  
25 assessors, data analysts), and how  
26

27 17b If blinded, circumstances under which unblinding is permissible, and procedure for revealing a participant's \_\_\_\_\_n/a\_\_\_\_\_  
28 allocated intervention during the trial  
29  
30

31 **Methods: Data collection, management, and analysis**  
32

33 Data collection methods 18a Plans for assessment and collection of outcome, baseline, and other trial data, including any related \_\_\_\_\_13\_\_\_\_\_  
34 processes to promote data quality (eg, duplicate measurements, training of assessors) and a description of  
35 study instruments (eg, questionnaires, laboratory tests) along with their reliability and validity, if known.  
36 Reference to where data collection forms can be found, if not in the protocol  
37

38 18b Plans to promote participant retention and complete follow-up, including list of any outcome data to be \_\_\_\_\_n/a\_\_\_\_\_  
39 collected for participants who discontinue or deviate from intervention protocols  
40  
41  
42  
43  
44



|    |                                 |     |                                                                                                                                                                                                                                                                                                                                       |                 |
|----|---------------------------------|-----|---------------------------------------------------------------------------------------------------------------------------------------------------------------------------------------------------------------------------------------------------------------------------------------------------------------------------------------|-----------------|
| 1  |                                 |     |                                                                                                                                                                                                                                                                                                                                       |                 |
| 2  |                                 |     |                                                                                                                                                                                                                                                                                                                                       |                 |
| 3  | Data management                 | 19  | Plans for data entry, coding, security, and storage, including any related processes to promote data quality (eg, double data entry; range checks for data values). Reference to where details of data management procedures can be found, if not in the protocol                                                                     | ___13_____      |
| 4  |                                 |     |                                                                                                                                                                                                                                                                                                                                       |                 |
| 5  |                                 |     |                                                                                                                                                                                                                                                                                                                                       |                 |
| 6  |                                 |     |                                                                                                                                                                                                                                                                                                                                       |                 |
| 7  | Statistical methods             | 20a | Statistical methods for analysing primary and secondary outcomes. Reference to where other details of the statistical analysis plan can be found, if not in the protocol                                                                                                                                                              | ___13_____      |
| 8  |                                 |     |                                                                                                                                                                                                                                                                                                                                       |                 |
| 9  |                                 |     |                                                                                                                                                                                                                                                                                                                                       |                 |
| 10 |                                 | 20b | Methods for any additional analyses (eg, subgroup and adjusted analyses)                                                                                                                                                                                                                                                              | ___13_____      |
| 11 |                                 |     |                                                                                                                                                                                                                                                                                                                                       |                 |
| 12 |                                 | 20c | Definition of analysis population relating to protocol non-adherence (eg, as randomised analysis), and any statistical methods to handle missing data (eg, multiple imputation)                                                                                                                                                       | ___n/a_____     |
| 13 |                                 |     |                                                                                                                                                                                                                                                                                                                                       |                 |
| 14 |                                 |     |                                                                                                                                                                                                                                                                                                                                       |                 |
| 15 | <b>Methods: Monitoring</b>      |     |                                                                                                                                                                                                                                                                                                                                       |                 |
| 16 |                                 |     |                                                                                                                                                                                                                                                                                                                                       |                 |
| 17 | Data monitoring                 | 21a | Composition of data monitoring committee (DMC); summary of its role and reporting structure; statement of whether it is independent from the sponsor and competing interests; and reference to where further details about its charter can be found, if not in the protocol. Alternatively, an explanation of why a DMC is not needed | ___13_____      |
| 18 |                                 |     |                                                                                                                                                                                                                                                                                                                                       |                 |
| 19 |                                 |     |                                                                                                                                                                                                                                                                                                                                       |                 |
| 20 |                                 |     |                                                                                                                                                                                                                                                                                                                                       |                 |
| 21 |                                 |     |                                                                                                                                                                                                                                                                                                                                       |                 |
| 22 |                                 | 21b | Description of any interim analyses and stopping guidelines, including who will have access to these interim results and make the final decision to terminate the trial                                                                                                                                                               | ___12_____      |
| 23 |                                 |     |                                                                                                                                                                                                                                                                                                                                       |                 |
| 24 |                                 |     |                                                                                                                                                                                                                                                                                                                                       |                 |
| 25 | Harms                           | 22  | Plans for collecting, assessing, reporting, and managing solicited and spontaneously reported adverse events and other unintended effects of trial interventions or trial conduct                                                                                                                                                     | ___13 & 14_____ |
| 26 |                                 |     |                                                                                                                                                                                                                                                                                                                                       |                 |
| 27 |                                 |     |                                                                                                                                                                                                                                                                                                                                       |                 |
| 28 | Auditing                        | 23  | Frequency and procedures for auditing trial conduct, if any, and whether the process will be independent from investigators and the sponsor                                                                                                                                                                                           | ___n/a_____     |
| 29 |                                 |     |                                                                                                                                                                                                                                                                                                                                       |                 |
| 30 |                                 |     |                                                                                                                                                                                                                                                                                                                                       |                 |
| 31 |                                 |     |                                                                                                                                                                                                                                                                                                                                       |                 |
| 32 | <b>Ethics and dissemination</b> |     |                                                                                                                                                                                                                                                                                                                                       |                 |
| 33 |                                 |     |                                                                                                                                                                                                                                                                                                                                       |                 |
| 34 | Research ethics approval        | 24  | Plans for seeking research ethics committee/institutional review board (REC/IRB) approval                                                                                                                                                                                                                                             | ___6_____       |
| 35 |                                 |     |                                                                                                                                                                                                                                                                                                                                       |                 |
| 36 |                                 |     |                                                                                                                                                                                                                                                                                                                                       |                 |
| 37 | Protocol amendments             | 25  | Plans for communicating important protocol modifications (eg, changes to eligibility criteria, outcomes, analyses) to relevant parties (eg, investigators, REC/IRBs, trial participants, trial registries, journals, regulators)                                                                                                      | ___14_____      |
| 38 |                                 |     |                                                                                                                                                                                                                                                                                                                                       |                 |
| 39 |                                 |     |                                                                                                                                                                                                                                                                                                                                       |                 |
| 40 |                                 |     |                                                                                                                                                                                                                                                                                                                                       |                 |
| 41 |                                 |     |                                                                                                                                                                                                                                                                                                                                       |                 |
| 42 |                                 |     |                                                                                                                                                                                                                                                                                                                                       |                 |
| 43 |                                 |     |                                                                                                                                                                                                                                                                                                                                       |                 |
| 44 |                                 |     |                                                                                                                                                                                                                                                                                                                                       |                 |
| 45 |                                 |     |                                                                                                                                                                                                                                                                                                                                       |                 |
| 46 |                                 |     |                                                                                                                                                                                                                                                                                                                                       |                 |
| 47 |                                 |     |                                                                                                                                                                                                                                                                                                                                       |                 |

|    |                               |     |                                                                                                                                                                                                                                                                                     |               |
|----|-------------------------------|-----|-------------------------------------------------------------------------------------------------------------------------------------------------------------------------------------------------------------------------------------------------------------------------------------|---------------|
| 1  |                               |     |                                                                                                                                                                                                                                                                                     |               |
| 2  |                               |     |                                                                                                                                                                                                                                                                                     |               |
| 3  | Consent or assent             | 26a | Who will obtain informed consent or assent from potential trial participants or authorised surrogates, and how (see Item 32)                                                                                                                                                        | _____7_____   |
| 4  |                               |     |                                                                                                                                                                                                                                                                                     |               |
| 5  |                               |     |                                                                                                                                                                                                                                                                                     |               |
| 6  |                               | 26b | Additional consent provisions for collection and use of participant data and biological specimens in ancillary studies, if applicable                                                                                                                                               | _____7_____   |
| 7  |                               |     |                                                                                                                                                                                                                                                                                     |               |
| 8  | Confidentiality               | 27  | How personal information about potential and enrolled participants will be collected, shared, and maintained in order to protect confidentiality before, during, and after the trial                                                                                                | _____15_____  |
| 9  |                               |     |                                                                                                                                                                                                                                                                                     |               |
| 10 |                               |     |                                                                                                                                                                                                                                                                                     |               |
| 11 | Declaration of interests      | 28  | Financial and other competing interests for principal investigators for the overall trial and each study site                                                                                                                                                                       | _____18_____  |
| 12 |                               |     |                                                                                                                                                                                                                                                                                     |               |
| 13 |                               |     |                                                                                                                                                                                                                                                                                     |               |
| 14 | Access to data                | 29  | Statement of who will have access to the final trial dataset, and disclosure of contractual agreements that limit such access for investigators                                                                                                                                     | _____15_____  |
| 15 |                               |     |                                                                                                                                                                                                                                                                                     |               |
| 16 |                               |     |                                                                                                                                                                                                                                                                                     |               |
| 17 | Ancillary and post-trial care | 30  | Provisions, if any, for ancillary and post-trial care, and for compensation to those who suffer harm from trial participation                                                                                                                                                       | _____n/a_____ |
| 18 |                               |     |                                                                                                                                                                                                                                                                                     |               |
| 19 |                               |     |                                                                                                                                                                                                                                                                                     |               |
| 20 | Dissemination policy          | 31a | Plans for investigators and sponsor to communicate trial results to participants, healthcare professionals, the public, and other relevant groups (eg, via publication, reporting in results databases, or other data sharing arrangements), including any publication restrictions | _____15_____  |
| 21 |                               |     |                                                                                                                                                                                                                                                                                     |               |
| 22 |                               |     |                                                                                                                                                                                                                                                                                     |               |
| 23 |                               |     |                                                                                                                                                                                                                                                                                     |               |
| 24 |                               |     |                                                                                                                                                                                                                                                                                     |               |
| 25 |                               | 31b | Authorship eligibility guidelines and any intended use of professional writers                                                                                                                                                                                                      | _____n/a_____ |
| 26 |                               |     |                                                                                                                                                                                                                                                                                     |               |
| 27 |                               | 31c | Plans, if any, for granting public access to the full protocol, participant-level dataset, and statistical code                                                                                                                                                                     | _____n/a_____ |
| 28 |                               |     |                                                                                                                                                                                                                                                                                     |               |
| 29 | <b>Appendices</b>             |     |                                                                                                                                                                                                                                                                                     |               |
| 30 |                               |     |                                                                                                                                                                                                                                                                                     |               |
| 31 | Informed consent materials    | 32  | Model consent form and other related documentation given to participants and authorised surrogates                                                                                                                                                                                  | _____Yes_____ |
| 32 |                               |     |                                                                                                                                                                                                                                                                                     | _____         |
| 33 |                               |     |                                                                                                                                                                                                                                                                                     |               |
| 34 | Biological specimens          | 33  | Plans for collection, laboratory evaluation, and storage of biological specimens for genetic or molecular analysis in the current trial and for future use in ancillary studies, if applicable                                                                                      | _____Yes_____ |
| 35 |                               |     |                                                                                                                                                                                                                                                                                     | _____         |
| 36 |                               |     |                                                                                                                                                                                                                                                                                     |               |

37 \*It is strongly recommended that this checklist be read in conjunction with the SPIRIT 2013 Explanation & Elaboration for important clarification on the items.  
 38 Amendments to the protocol should be tracked and dated. The SPIRIT checklist is copyrighted by the SPIRIT Group under the Creative Commons  
 39 "[Attribution-NonCommercial-NoDerivs 3.0 Unported](https://creativecommons.org/licenses/by-nc-nd/3.0/)" license.  
 40
